1           **Host bioenergetic parameters reveal cytotoxicity of anti-tuberculosis drugs**  
2                                   **undetected using conventional viability assays.**

3  
4  
5   Bridgette M. Cumming<sup>a</sup>, Zainab Baig<sup>a</sup>, Kelvin W. Addicott<sup>a</sup>, D Chen<sup>b</sup>, AJC Steyn<sup>a,c,d</sup>

6  
7   <sup>a</sup>Africa Health Research Institute, Durban, KwaZulu-Natal, South Africa

8   <sup>b</sup>Division of Preventive Medicine and Comprehensive Cancer Center. University of  
9   Alabama at Birmingham, Birmingham, AL, USA

10   <sup>c</sup>Department of Microbiology, University of Alabama at Birmingham, AL, USA

11   <sup>d</sup>Centers for AIDS Research and for Free Radical Biology, University of Alabama at  
12   Birmingham, Birmingham, AL, USA

13

14

15

16   Running title: Bioenergetics reveal cytotoxicity of TB drugs

17

18   Address correspondence to:

19   Adrie J.C. Steyn

20   [asteyn@uab.edu](mailto:asteyn@uab.edu) OR [adrie.steyn@ahri.org](mailto:adrie.steyn@ahri.org)

21

22

23

## 24 **Abstract**

25 High attrition rates in tuberculosis (TB) drug development have been largely attributed to  
26 safety, which is likely due to the use of endpoint assays measuring cell viability to detect  
27 drug cytotoxicity. In drug development of cancer, metabolic and neurological disorders,  
28 and antibiotics, cytotoxicity is increasingly being assessed using extracellular flux (XF)  
29 analysis, which measures cellular bioenergetic metabolism in real-time. Here, we adopt  
30 the XF platform to investigate the cytotoxicity of drugs currently used in TB treatment on  
31 the bioenergetic metabolism of HepG2 cells, THP-1 macrophages, and human monocyte  
32 derived macrophages (hMDM). We found that the XF analysis reveals earlier drug-  
33 induced effects on the cells' bioenergetic metabolism prior to cell death, measured by  
34 conventional viability assays. Furthermore, each cell type has a distinct response to drug  
35 treatment, suggesting that more than one cell type should be considered to examine  
36 cytotoxicity in TB drug development. Interestingly, chemically unrelated drugs with  
37 different modes of action on *Mycobacterium tuberculosis* have similar effects on the  
38 bioenergetic parameters of the cells, thus, discouraging the prediction of potential  
39 cytotoxicity based on chemical structure and mode of action of new chemical entities.  
40 The clustering of the drug-induced effects on the hMDM bioenergetic parameters are  
41 reflected in the clustering of the effects of the drugs on cytokine production in hMDMs,  
42 demonstrating concurrence between the effects of the drugs on the metabolism and  
43 functioning of the macrophages. These findings can be used as a benchmark to establish  
44 XF analysis as a new tool to assay cytotoxicity in TB drug development.

45

46

47

## 48 **Introduction**

49 Although curative treatment is available for tuberculosis (TB), it requires adherence to a  
50 prolonged duration of drug therapy and exposes patients to drug induced toxicities. The  
51 standard treatment for drug susceptible TB includes rifampicin, isoniazid, ethambutol, and  
52 pyrazinamide over a two-month intensive phase followed by a continuation phase of  
53 rifampicin and isoniazid for 4 months. Toxicities of anti-TB drugs have been reported in  
54 up to 80% of TB patients (1), of which the most common is hepatic toxicity associated  
55 with isoniazid, rifampicin and pyrazinamide (2) in 2% to 28% of TB patients (3). Peripheral  
56 neuropathy from isoniazid, occurs in up to 40% of TB patients (4), and more frequently  
57 among TB-HIV co-infected patients (5, 6). Ethambutol has commonly been reported to  
58 cause ocular toxicity, demonstrated by either optic or retrobulbar neuritis that is either  
59 reversible or irreversible (7-9). However, medications used to treat multidrug resistant TB  
60 (MDR-TB), have much worse side effects (10). The most common adverse effects of the  
61 aminoglycosides include ototoxicity, vestibular toxicity (11, 12), nephrotoxicity and  
62 electrolyte abnormalities (13, 14). Central nervous system adverse effects have been  
63 described in adults treated with fluoroquinolones (15, 16) in particular, with cycloserine  
64 (17, 18). Furthermore, peripheral neuropathy is well documented among patients on  
65 prolonged linezolid treatment(19), including toxic optic neuropathy (20, 21).  
66 Gastrointestinal intolerance and reversible hypothyroidism are known adverse effects of  
67 ethionamide and prothionamide during long term therapy (22-24). This plethora of  
68 adverse effects is likely because most of the anti-TB drugs were discovered in the 1950's  
69 and 1960's with new drugs only being discovered in the last 10 years (25). The side-  
70 effects of anti-TB drugs impact adherence to chemotherapy and often result in relapse,  
71 treatment suspension or failure and development of drug-resistance. Thus, the

72 development of new drugs with less cytotoxicity, shorter regimens and fewer side effects  
73 are needed.

74 Although methodologies used to assess drug cytotoxicity in the early stages of  
75 drug development have evolved over the last few years, documented “cytotoxicity” is  
76 highly dependent on the type of assay and the cell type used to assay drug toxicity. These  
77 inconsistencies urge us to ask what defines cytotoxicity, what should be measured and  
78 how can it be measured? Most standard cytotoxicity assays used in anti-TB drug  
79 development are endpoint assays measuring the viability or the integrity of the  
80 membranes of the cells. Viability assays include different classes of colorimetric  
81 tetrazolium reduction, resazurin reduction, protease markers and ATP detection (26).  
82 Endpoint assays that assess the integrity of the cell membrane include the lactate  
83 dehydrogenase release assay and trypan blue exclusion assays. However, these assays  
84 only measure how the drug affects one parameter of the cell, of which not all accurately  
85 represent the onset of cytotoxicity. Furthermore, these endpoint assays do not allude to  
86 alterations in the health of the cell that could potentially impact the functions of the cells  
87 in the absence of death. Nonetheless, defining the health status of a cell proves to be  
88 challenging in that there is no clear delineation as to what we measure and how we  
89 measure it.

90 High attrition rates in recent drug development have been ascribed to safety issues  
91 with organ toxicity (27, 28), which has subsequently been proven to be due to or has  
92 strong evidence suggesting links to mitochondrial impairment (29-34). This has led to the  
93 development of several *in vitro* assays to measure mitochondrial function. Measurement  
94 of the oxygen consumption rate (OCR) in real-time gives an indirect measurement of  
95 mitochondrial respiration. The Extracellular flux (XF) analyzer (Agilent) enables high-

96 resolution, real-time multi-well plate readings of OCR in addition to real time  
97 measurements of changes in the extracellular proton concentration to provide  
98 extracellular acidification rate (ECAR), which is considered an indirect measure of  
99 glycolysis. The response of OCR and ECAR to the consecutive addition of known  
100 mitochondrial and electron transport chain (ETC) modulators or stressors is used to  
101 calculate bioenergetic parameters associated with OXPHOS and metabolism of the cells,  
102 namely, basal respiration, basal ECAR, ATP-linked OCR, compensatory ECAR, maximal  
103 respiration, spare respiratory capacity, proton leak and non-mitochondrial respiration (35).  
104 In some cases, these parameters can reveal drug cytotoxicity that is not detected in  
105 measurements of oxygen consumption rate (OCR) or extracellular acidification rate  
106 (ECAR) alone (36). ATP-linked OCR, determined from the decrease in basal respiration  
107 after the addition of an inhibitor of ATP-synthase (Complex V), oligomycin, has also been  
108 used to identify drugs that induce mitochondrial toxicity by reducing, or inhibiting the  
109 activity of ATP synthase (37). Uncoupled respiration, induced by ionophores, results in  
110 maximal respiration that has been used as an indicator of the integrity of the ETC after  
111 drug treatment (38, 39). Extracellular flux analysis, has been used to assess the  
112 cytotoxicity of drugs (30, 40-42) in the treatment of depression (43), the cancer field (44),  
113 anesthetics (45), antibiotics (39, 46) and metabolic disorders (38). However, extracellular  
114 flux analysis has not yet been investigated as a potential platform to identify cytotoxic  
115 insults induced by anti-TB drugs.

116 Cell lines most often used to test the cytotoxicity of anti-TB drugs and new TB drug  
117 leads include, the human hepatocellular carcinoma cell line, HepG2 cells, to assess the  
118 hepatotoxicity of the drugs (47, 48), the human alveolar epithelial cell type 2 carcinoma  
119 cell line A549 (49-51) as the lung epithelium is the first lung surface coming into contact

120 with *Mycobacterium tuberculosis* (*Mtb*) (52), THP-1 human monocytic cell line (53, 54)  
121 and Vero (African green monkey kidney epithelial carcinoma) cells (55). Here, we  
122 adopted extracellular flux analysis as a rapid real-time platform to investigate the  
123 cytotoxicity of nine anti-TB drugs individually, and in combinations, currently used to treat  
124 drug susceptible and multi-drug resistant TB on three human cell types, the HepG2  
125 hepatocyte cell line, phorbol myristate acetate differentiated THP-1 monocytes, and  
126 human monocyte derived macrophages (hMDM). Eight bioenergetic parameters  
127 calculated from the extracellular flux assay were compared to the viability results obtained  
128 from a MTT (3-(4,5-Dimethylthiazol-2-Yl)-2,5-Diphenyltetrazolium Bromide) tetrazolium  
129 reduction assay. This assay measures the ability of NAD(P)H dependent oxidoreductase  
130 enzymes to reduce a tetrazolium salt to formazan and is considered a measure of  
131 metabolism (56). These modulations of the bioenergetic parameters were compared with  
132 the effects of the anti-TB drugs on the functions of the hMDMs by measuring the cytokine  
133 levels in the supernatants of the hMDMs following treatment with the anti-TB drugs.

134

## 135 **Results**

### 136 **Experimental design**

137 We explored the potential of extracellular flux analysis as a platform to assess the  
138 cytotoxic effects of anti-TB drugs on the energy metabolism of human cells according to  
139 the workflow diagram in [Fig. 1](#). Three cell types (HepG2, THP-1 macrophages and  
140 hMDMs) were treated with anti-TB drugs individually or in combination for 24 hours. The  
141 effects of the anti-TB drugs on the cells were analyzed by (1) extracellular flux analysis to  
142 determine eight bioenergetic parameters, (2) the MTT assay to determine viability, and  
143 (3) in the case of the drug-treated hMDMs, the culture supernatant was collected for

144 cytokine analysis. The resultant bioenergetic parameters, viabilities and cytokine  
145 production of the drug-treated cells were analyzed using hierarchical clustering,  
146 Pearson's correlation co-efficient and principal component analysis (PCA).

147 The three cell types, HepG2 (hepatocytes), phorbol myristate acetate differentiated  
148 THP-1 monocytes (THP-1) and human monocyte derived macrophages (hMDM) were  
149 treated with nine anti-TB drugs individually or two drug combinations for 24 hours (Fig.  
150 1). HepG2 cells are a human hepatoma cell line that is commonly used to investigate the  
151 hepatic metabolism and hepatic toxicity of new drug leads that is induced by mitochondrial  
152 dysfunction resulting from the drugs directly targeting the electron transport chain (57).  
153 Thus, we compared the effects of the anti-TB drugs on the bioenergetics of the HepG2  
154 cells with that of two human macrophage cell types, human monocyte derived  
155 macrophages (hMDMs) and a human THP-1 monocytic cell line that is differentiated with  
156 phorbol 12-myristate 13-acetate (PMA) to macrophages. We chose terminally  
157 differentiated human macrophages as these are usually the first immune cells to come  
158 into contact with *Mtb* through the aerosolized route of infection. We did not use mouse  
159 macrophages, due to the reported gene-expression and metabolic differences between  
160 human and murine macrophages (58-61). As larger deviations are observed in the  
161 response of hMDMs derived from different donors, responses of macrophages generated  
162 from the terminal differentiation of the human THP-1 monocytic cell line were also  
163 investigated.

164 The cells were treated with 1x, 10x, 50x and 100x the minimum inhibitory  
165 concentration (MIC) of the drug against *Mtb*, in the case of isoniazid (INH), rifampicin  
166 (RIF), pyrazinamide (PZA), ethambutol (EMB), moxifloxacin (MXF), clofazimine (CFZ)  
167 and linezolid (LZD); MIC<sub>50</sub> in the case of BDQ and MIC<sub>10</sub> in the case of streptomycin

168 (STR). The MIC concentrations were used to enable comparisons among the effects of  
169 the different drugs on three cell types, as the physiological concentrations of the drugs  
170 vary between the serum and site of infection, in addition to differing protein binding  
171 capacities of the drugs and variable drug absorption, metabolism, distribution and  
172 perfusion of the infected areas among TB patients. As TB chemotherapy requires  
173 combination therapy to prevent the development of *Mtb* drug-resistance and to combat  
174 the tendency of *Mtb* to persist in the face of drug treatment (62, 63), two sets of drug  
175 combinations were also examined at 1x and 10x MIC of the drugs in the combination.  
176 The first combination included all the drugs used in frontline treatment of drug susceptible  
177 TB: INH, RIF, PZA, EMB and STR (64). The second combination just included INH and  
178 RIF as TB patients are treated with these two drugs for four months of their six-month  
179 regimen.

180

### 181 **Bioenergetic parameters derived from extracellular flux analysis**

182 In the extracellular flux analysis, we used the Cell Mito Stress Test (CMST) on the XFe96  
183 to calculate eight bioenergetic parameters of the untreated and drug-treated cells ([Fig. 1](#)).  
184 During the CMST run on the XFe96, mitochondrial modulators are added to the cells and  
185 the resulting changes in oxygen consumption rate (OCR) and extracellular acidification  
186 rate (ECAR) are used to calculate the following bioenergetic parameters: the basal  
187 respiration (Basal Resp), ATP-linked OCR, proton leak, maximal respiration (Max Resp),  
188 spare respiratory capacity (SRC), non-mitochondrial respiration (Non-mito OCR), basal  
189 extracellular acidification rate (Basal ECAR), and compensatory extracellular acidification  
190 rate (Comp ECAR) ([Fig. 2A-C](#)) (35).



191           Initially in the CMST, the respiration (OCR) of the untreated or drug-treated cells  
192 are measured to determine the basal respiration (Fig. 2B). This is followed by the addition  
193 of oligomycin, which inhibits complex V (ATP synthase, Fig. 2A), to establish how much  
194 oxygen is consumed in the production of mitochondrial ATP by complex V. This ATP-  
195 linked OCR is equivalent to the decrease in the OCR following the addition of oligomycin  
196 (Fig. 2B). Subsequently, an ionophore, carbonyl cyanide 4-(trifluoromethoxy)  
197 phenylhydrazone (FCCP) is added to the cells, which allows protons to leak across the  
198 mitochondrial membrane into the matrix. This depolarizes the mitochondrial membrane  
199 potential resulting in the ramping up of electron transport in the electron transport chain  
200 (ETC) to pump protons out of the matrix to re-establish the proton gradient and the  
201 mitochondrial membrane potential. The increased electron transport increases the  
202 oxygen consumption at complex IV and enables a measurement of the maximal  
203 respiration of the cell (Fig. 2A and B). After the addition of antimycin A and rotenone,  
204 inhibitors of complex III and complex I, the ETC is shut down resulting in inhibition of  
205 mitochondrial OCR, and the resultant OCR gives a measurement of the non-  
206 mitochondrial respiration (Fig. 2A and B). This non-mitochondrial OCR is then subtracted  
207 from the basal respiration and the maximal respiration to give their true mitochondrial  
208 values. The difference between the non-mitochondrial respiration and the ATP-linked  
209 OCR is equivalent to the proton leak, which is the measure of oxygen consumption at  
210 Complex IV that is not linked to ATP production and involved in restoring the mitochondrial  
211 membrane potential that is depolarized by the natural leak of protons into the  
212 mitochondrial matrix. SRC, which gives a measurement of the cell's capacity to respire  
213 under conditions of stress, is calculated by the difference between the maximal respiration  
214 and the basal respiration. Extracellular acidification is generated by lactic acid that is

215 derived from pyruvate, the end-product of glycolysis, and carbonic acid that is derived  
216 from carbon dioxide produced by the TCA cycle (65). ECAR measurements made  
217 simultaneously during the CMST run are used to determine the basal ECAR (ECAR prior  
218 to the addition of oligomycin) and compensatory ECAR (after the addition of oligomycin).  
219 Compensatory ECAR is induced by the inhibition of mitochondrial ATP synthase with  
220 oligomycin, which results in increased glycolysis to generate ATP for the cell's demands  
221 (Fig. 2B).

222 Representative CMST OCR and ECAR profiles of each cell type are illustrated in  
223 Fig. 2D-I together with the altered profiles of the cells after treatment with increasing  
224 concentrations of isoniazid (INH). The calculated bioenergetic parameters from the  
225 HepG2 profiles in Fig 2D and 2G are shown in the Fig. 2J panel; from the THP-1 profiles  
226 in Fig. 2E and H are shown in Fig. 2K; and from the hMDM profiles in Fig. 2F and I are  
227 shown in Fig. 2L. These bioenergetic parameters provide quantitative measurements of  
228 aspects of mitochondrial respiration, non-mitochondrial respiration, and extracellular  
229 acidification, which enable assessment of how a potential drug affects the bioenergetic  
230 pathways of the cell that provide ATP. For instance, increasing concentrations of INH  
231 decreased both the Basal Resp and the ATP-linked OCR of the HepG2 cells (Fig. 2J) and  
232 to a lesser extent in THP-1 cells (Fig. 2K), which are both essential for promoting  
233 OXPHOS. In both macrophage models, THP-1 cells and hMDMs, INH decreased both  
234 the Max Resp and the SRC that both give a measure of the cell's ability to respond to  
235 conditions of stress (Fig. 2K and 2L). In hMDMs, INH increased the proton leak, which  
236 results in incomplete coupling of oxygen consumption and ATP synthesis in OXPHOS.  
237 Furthermore, INH decreased the basal ECAR and compensatory ECAR of both the  
238 HepG2 cells and the THP-1 cells (Fig. 2J and K) suggesting additional suppression of

239 glycolysis. These findings suggest that INH depresses the bioenergetic pathways,  
240 particularly in the HepG2 cells and THP-1 cells.

241 However, moxifloxacin, for example, altered the bioenergetic parameters of these  
242 cell types differently (Fig. S1). Although increasing concentrations of moxifloxacin (MXF)  
243 reduced the Basal Resp, Max Resp and ATP-linked OCR of the HepG2 cells and the  
244 hMDMs, it had no effect on these parameters in the THP-1 cells (Fig. S1B-D).  
245 Furthermore, MXF significantly reduced the Basal ECAR and Comp ECAR in all three cell  
246 types. The bioenergetic parameters of all three cell types in response to the anti-TB drug  
247 treatments are listed in Dataset S1.

248 In summary, we have adopted the extracellular flux analysis platform to assess the  
249 cytotoxic effects of anti-TB drugs on the bioenergetic metabolism of HepG2, THP-1 and  
250 hMDM cells. We have used the CMST assay, which generates eight bioenergetic  
251 parameters that reveal how anti-TB drugs modulate different aspects of respiration and  
252 glycolysis. Here, we have demonstrated how increasing concentrations of two of the  
253 drugs investigated, INH and MXF altered the OCR and ECAR profiles of the three cell  
254 types and the resulting bioenergetic parameters. The responses of the bioenergetic  
255 parameters of each cell type to the drug treatment were analyzed using hierarchical  
256 clustering, Pearson's correlation co-efficient and principal component analysis (PCA) to  
257 identify any distinct trends.

258

259 **Each cell type has a unique bioenergetic fingerprint in response to the anti-TB**  
260 **drugs**

261 Hierarchical clustering was used to determine to determine if the bioenergetic metabolism  
262 of the three cell types respond similarly to the anti-TB drugs. The three cell types were

263 treated with four concentrations of nine anti-TB drugs individually and two concentrations  
264 of two drug combinations. After 24 hrs treatment, their bioenergetic metabolism was  
265 examined using extracellular flux analysis and the CMST assay to calculate the eight  
266 bioenergetic parameters. Hierarchical cluster analysis of the bioenergetic parameters of  
267 the drug-treated cells relative to untreated cells was performed to assess if the drugs  
268 induced similar changes in the bioenergetic parameters of the different cell types. Both  
269 rows and columns of normalized relative values were used in the clustering where  
270 Euclidean methods were applied for dissimilarities across both rows and columns. Z-  
271 normalization was performed to transform relative values of the bioenergetic values to  
272 average = 0 and SD = 1. Fig. 3 shows heat maps of the z-normalization values where  
273 rows (drugs and their concentrations) and columns (bioenergetic parameters) have been  
274 ordered based on their correlation hierarchical clustering, using the average linkage  
275 method. Hierarchical clustering of the effects of the drugs on the bioenergetic parameters  
276 of all three cell types (Fig. 3A) demonstrates no clustering according to cell type or drug.  
277 This suggested that the measurement of eight bioenergetic parameters enabled the  
278 detection of a variety of effects on the bioenergetic processes in different cells.

279 The heat maps of the hierarchical clustering of the effects of the drugs on the  
280 bioenergetic parameters of the individual cell types (Fig. 3B-D) demonstrate that each cell  
281 type has distinctive patterns in their response to the drug treatments. These distinct  
282 patterns of clustering observed in each cell type have been indicated with boxes to  
283 facilitate discussion. In the HepG2 cells, the effects of all four concentrations of EMB,  
284 three of MXF and two of PZA cluster together because they reduce the z-normalization  
285 values of all the bioenergetic parameters below the average (Fig. 3B, box a). The second  
286 cluster is divided into two groups with distinct patterns (Fig. 3B, box b and c). Both groups

287 contain the same drugs, but at different concentrations. The drugs include BDQ, INH,  
288 RIF, STR, LZD, PZA, CFZ and the two drug combinations (5FLD and INH.RIF), but the  
289 concentrations of each drug are interspersed between each other. This second cluster  
290 also includes the effects of 10x MIC of MXF, but they are separated from the effects of  
291 the other drugs in the second cluster. The effects of the 50x and 100x MIC of CFZ cluster  
292 separately from the effects of all the drugs (Fig. 3B, box d) with low z-normalization values  
293 for maximal respiration, SRC and ATP-linked OCR and high z-normalization values for  
294 proton leak. In the HepG2 cells, the proton leak is distinct from the clustering of the other  
295 bioenergetic parameters, with the ATP-linked OCR and the Max Resp being the most  
296 closely linked parameters.

297 In the THP-1 cells, there is a great deal more clustering of the effects of several  
298 concentrations of the same drug on the bioenergetic parameters than detected in the  
299 HepG2 cells. This suggests that some of the anti-TB drugs have very distinct effects on  
300 the THP-1 cells that is not observed in the HepG2 cells. For example, the effects of all  
301 four concentrations of EMB and of LZD cluster distinctly together in Fig. 3C, box e and f,  
302 respectively. The effects induced by three concentrations each of MXF, of BDQ and of  
303 PZA cluster together distinctly (Fig. 3C, box e, f and g, respectively); and two  
304 concentrations each of INH, RIF and CFZ cluster together. However, THP-1 cells do  
305 behave similarly to the HepG2 cells in that the effects of EMB and MXF cluster together  
306 because they reduce the z-normalization values below normal (Figure 3C, box e). Yet in  
307 the case of the THP-1 cells, the effects of MXF and EMB cluster together with two STR  
308 concentrations and the 10x MIC of both drug combinations, 5FLD and INH.RIF (Fig. 3C,  
309 box e). The “block” showing the effects of the four concentrations of LZD clusters with  
310 the effects of the 10x MIC concentration of both STR and MXF (Fig 3C, box f). This

311 cluster (box f) is closely linked to the effects of BDQ, RIF and INH clustered together with  
312 100x MIC STR and 10x MIC CFZ, (Fig. 3C, cluster g) by inducing small or no fluctuations  
313 on z-normalization values from the average. Strikingly, the effects of three PZA  
314 concentrations are clustered on their own inducing higher than average z-normalization  
315 values in the ATP-linked OCR, Max Resp, Non-Mito OCR and Basal Resp (Fig. 3C, box  
316 h). The 1x MIC concentration of PZA has the most divergent effects on the bioenergetic  
317 parameters such that it clusters separately from all the other drugs (Fig. 3C, last row in  
318 box j). The effects of the lowest concentrations of CFZ, and both drug combinations,  
319 5FLD and INH.RIF, cluster together (Fig 3C, box i), with the effects of the 50x and 100x  
320 MIC CFZ also clustering apart from the effects of the other drugs (Fig. 3C, box j), by  
321 inducing lower than average z-normalization values for the ATP-linked OCR, Max Resp,  
322 Non-Mito OCR and Basal Resp. The hierarchical clustering of the bioenergetic  
323 parameters indicates that the effects of the drugs on the SRC of the THP-1 cells cluster  
324 separately from the other bioenergetic parameters.

325 Treatment of the hMDM cells with the anti-TB drugs appears to induce more lower  
326 z-normalization values than those observed in the other two cell types (Fig. 3D). As in  
327 the case of the THP-1 cells, the effects of MXF and EMB are clustered together with the  
328 effects of 1x MIC of STR, but in the hMDMs, they are also clustered with the low  
329 concentrations of BDQ and higher concentrations of PZA because they all reduce the z-  
330 normalization values below average (Fig. 3D, box k). This cluster (box k) is closely linked  
331 to a cluster of the effects of the two drug combinations, 5FLD and INH.RIF and other  
332 concentrations of BDQ, PZA and STR that have some minimal fluctuations in the z-  
333 normalization values from average (Fig 3D, box l). The effects of 50x and 10x MIC CFZ  
334 and 100x MIC LZD cluster separately but are still linked to previously described cluster

335 (Fig. 3D, box l). In contrast, the effects of RIF, INH, LZD, and remaining concentrations  
336 of STR, PZA and BDQ cluster together by increasing the z-normalization values of the  
337 bioenergetic parameters above average (Fig. 3D, box m). Lastly, similarly to both the  
338 HepG2 and THP-1 cells, the effects of the 100X MIC CFZ is clustered separate from the  
339 effects of all the other drugs (Fig. 3D, box n). Similar to the THP-1 cells, the drug induced  
340 changes in the SRC of the hMDMs clustered separately from the other bioenergetic  
341 parameters.

342 The relatedness between the cell types was examined using PCA analysis (66) of  
343 the effects of the four concentrations of the anti-TB drugs on the combined relative  
344 bioenergetic parameters of each cell type (Fig. 3E). When the PCA analysis of the cell  
345 types were compared pairwise, there was a noticeable separation between the effects of  
346 the drugs on the bioenergetic parameters of the HepG2 and THP-1 cells (Fig. 3F) that  
347 was not as well-defined when the hMDM cells were compared with the THP-1 cells (Fig.  
348 3G) or with the HepG2 cells (Fig. 3H). This illustrates that the anti-TB drugs do not have  
349 equal effects on all cell types and other cell types should be considered when assessing  
350 cytotoxicity/modulatory effects of anti-TB drugs.

351 In sum, the hierarchical clustering and PCA analysis of the bioenergetic  
352 parameters generated from the extracellular flux analysis revealed that the three cell  
353 types investigated demonstrate unique bioenergetic responses to treatment with the anti-  
354 TB drugs. Hierarchical clustering demonstrated different patterns of clustering of the  
355 bioenergetic parameters of the three cell types when treated with the anti-TB drugs. In  
356 particular, PCA analysis revealed that the bioenergetic parameters of the drug-treated  
357 THP-1 cells had more noticeable separation from the HepG2 cells than the hMDM cells.

358

359 **Basal respiration correlates with all other bioenergetic parameters in all three cell**  
360 **types**

361 To identify a bioenergetic parameter that correlates with the changes in the other  
362 bioenergetic parameters in response to treatment with any of the anti-TB drugs, Pearson's  
363 correlation co-efficient was calculated for all pairwise combinations of the combined  
364 bioenergetic parameters of all three cell types combined (Fig. 4A) and for each cell type  
365 individually (Fig. 4B-D). The left panel in Fig. 4A shows a heat map of the correlation co-  
366 efficient of each pairwise comparison of the combined bioenergetic parameters for all the  
367 cells, and in the right panel, the averages of these correlation co-efficient for each  
368 bioenergetic parameter is given in a heat map to demonstrate the parameters with the  
369 highest correlations. The Pearson's correlation co-efficient for the bioenergetic  
370 parameters of each cell type were demonstrated in a similar manner (Fig. 4B-D).

371 When the bioenergetic parameters of all cell types were analyzed, the relative  
372 Basal Resp had the highest correlation co-efficient ( $r = 0.64$ , Fig. 4A) with all the other  
373 bioenergetic parameters of all three cell types. In the case of the HepG2 cells, several  
374 bioenergetic parameters behave similarly to each other in response to the anti-TB drugs,  
375 with relative ATP-linked OCR and relative Comp ECAR having the highest correlation co-  
376 efficient ( $r = 0.70$ , Fig. 4B), followed by relative Basal Resp ( $r = 0.69$ ). Notably, the proton  
377 leak in the HepG2 cells exhibited a strong negative correlation with all the other  
378 bioenergetic parameters. This demonstrates strong inverse relationships between proton  
379 leak and the other bioenergetic parameters of the HepG2 cells when treated by the anti-  
380 TB drugs. In THP-1 cells, the relative Comp ECAR ( $r = 0.63$ , Fig. 4C) and Basal Resp ( $r$   
381  $= 0.61$ ) had the highest correlations with the other bioenergetic parameters in response  
382 to the anti-TB drugs. In hMDM cells, relative Basal Resp correlated with the changes in



383 the other respiratory parameters in response to the anti-TB drugs ( $r = 0.70$ , Fig. 4D) with  
384 Max Resp and Non-mito OCR also having a high correlation (0.68 in both cases).

385 Conversely, the bioenergetic parameter with the lowest correlation with the other  
386 bioenergetic parameters was proton leak in HepG2 cells ( $r = -0.70$ , Fig. 4B), SRC in THP-  
387 1 cells ( $r = 0.20$ , Fig. 4C), and SRC in hMDMs ( $r = 0.11$ , Fig. 4D). When the bioenergetic  
388 parameters of all the cells were combined, proton leak had the lowest correlation ( $r =$   
389  $0.23$ , Fig. 4A), followed by the SRC ( $r = 0.30$ ). This suggests that SRC and proton leak  
390 respond differently from the other parameters to anti-TB drug treatment, possibly due to  
391 increased sensitivity. This is feasible with SRC, given that SRC is a measure of the ability  
392 of the cell to respire under conditions of stress, which may be compromised with the anti-  
393 TB drug treatment.

394 Overall, we conclude that Basal Resp can be used to assess the overall changes  
395 in the bioenergetic metabolism induced by the anti-TB drugs as it has a high correlation  
396 co-efficient with the effects of the anti-TB drugs on the other bioenergetic parameters  
397 amongst all three cell types. Furthermore, Basal Resp has the highest correlation co-  
398 efficient in hMDMs. Another parameter that demonstrated high correlation with the other  
399 bioenergetic parameters in all three cell types was Comp ECAR, with it being the  
400 parameter with the highest correlation in THP-1 cells. In HepG2 cells, which are more  
401 oxidative than glycolytic, ATP-linked OCR is the parameter that has the highest  
402 correlation with the other bioenergetic parameters. SRC and proton leak demonstrated  
403 the least correlation with the other bioenergetic parameters, probably in response to  
404 different mechanisms of toxicity induced by the anti-TB drugs.

405

406 **The bioenergetic parameters enable separation of distinct effects of anti-TB drugs**

407 To identify if groups of anti-TB drugs have similar effects on the bioenergetic parameters  
408 of each cell type, the identity of the anti-TB drugs were selected in the PCA analysis on  
409 each cell type. Clustering of the drug effects on the bioenergetic parameters of the cell  
410 was most distinct in the THP-1 cells. [Fig. 5A](#) shows how the modulation of the THP-1  
411 bioenergetic parameters induced by EMB, MXF and LZD cluster separately from the  
412 effects of RIF, INH and BDQ on the THP-1 cells. The effects induced by PZA on the  
413 bioenergetics of the THP-1 cells are separated from the EMB-MXF-LZD and RIF-INH-  
414 BDQ clusters. The effects of the highest concentrations of CFZ (50x and 100x MIC) on  
415 THP-1 bioenergetics are even further removed from the effects of the other drugs. This  
416 reflects the hierarchical clustering of the effects of the drugs on the THP-1 bioenergetic  
417 parameters observed in the heatmap in [Fig. 3C](#).

418 In hMDM cells, the effects of EMB and MXF on the bioenergetics are again  
419 separated from the effects of INH and RIF on the hMDM bioenergetics ([Fig. 5B](#)). Specific  
420 to the hMDMs, the effects of LZD on the bioenergetics separated from the bulk of the  
421 effects of the other TB drugs. The effects of 100x MIC of CFZ was detached from the  
422 bioenergetic modulations generated by the other anti-TB drugs. This is supported by the  
423 hierarchical clustering of the effects of the drugs on the hMDM bioenergetic parameters  
424 in [Fig. 3D](#).

425 In the HepG2 cells, the separation of the effects on the anti-TB drugs on the  
426 bioenergetic parameters were less defined ([Fig. 5C](#)). As in the THP-1 and hMDM cells,  
427 the bioenergetic parameters of the MXF and EMB treated HepG2 cells were separated  
428 from the bioenergetic parameters of most of the other drug-treated cells ([Fig. 5C](#)). Again,  
429 the bioenergetic modulations induced by the highest concentrations of CFZ were clearly  
430 disconnected from the effects of the other anti-TB drugs on the bioenergetics of the

431 HepG2 cells. The clustering of MXF and EMB and the disconnection of CFZ align with  
432 the hierarchical clustering of the effects of the anti-TB drugs on the HepG2. Overall, these  
433 findings indicate that the bioenergetic parameters can be used to identify groups of drugs  
434 with similar effects on the bioenergetic metabolism of the cells.

435

#### 436 **The bioenergetic parameters reveal a broader range of effects than % viability**

437 As viability assays have been conventionally used to assess the cytotoxicity of new drug  
438 leads, we compared the percentage (%) viabilities obtained in MTT assays for each drug-  
439 treated cell type with the bioenergetic parameters obtained under the same conditions.  
440 We calculated the Pearson's correlation co-efficient for all possible pairwise combinations  
441 of the bioenergetic parameters with the % viabilities. Heatmaps in [Fig. 6A-D](#) reveal that  
442 viabilities of all the drug treatments negatively correlated with all the averaged  
443 bioenergetic parameters when the parameters of all three cell types were combined and  
444 separated by cell type. These negative correlations were all below -0.4.

445 This poor correlation between the % viability and the bioenergetic parameters of  
446 the cells was supported by PCA analysis of the bioenergetic parameters and % viabilities  
447 of all the cell types combined. [Fig. 6E](#) demonstrates the clear separation of the %  
448 viabilities of the MTT assay from all the bioenergetic parameters. Furthermore, PCA  
449 analysis shows that the relative SRC is separated to the greatest degree from the other  
450 bioenergetic parameters, which are clustered to some extent. The SRC is separated to  
451 the largest degree from proton leak. This is also supported by the Pearson correlation  
452 analysis where the relative SRC has the lowest positive correlation co-efficient with the  
453 other bioenergetic parameters in both the THP-1 and hMDM cells ([Fig. 6C and D](#)).  
454 However, in HepG2 cells and in the combination of the bioenergetic parameters of all

455 three cell types, the relative proton leak has the lowest positive correlation co-efficient,  
456 followed by SRC (Fig. 6A and B).

457 Line plots of the individual relative bioenergetic parameters and % viabilities versus  
458 concentrations of the drugs demonstrate variability in the parameters and % viabilities  
459 with an increase in drug concentration (Fig. S2). Fig. 5F and G shows representative line  
460 plots of the bioenergetic parameters and the % viability (thick red line) of the three cell  
461 types when treated with RIF (Fig. 5F) or with INH (Fig. 5G). The line plots demonstrate  
462 that the bioenergetic parameters of the cells exhibit a much broader range of effects than  
463 that observed in the % viability with an increase in drug concentration.

464 In summary, the bioenergetic parameters reveal changes in the energy  
465 metabolism of the three cell types induced by the anti-TB drugs that are not reflected by  
466 changes in the % viability measured using the MTT assay. This is due to the extracellular  
467 flux analyzer being an extremely sensitive instrument in that it measures oxygen  
468 consumption in pmoles O<sub>2</sub>/min and extracellular acidification in mpH/minute in addition to  
469 generating eight bioenergetic parameters with the addition of metabolic modulators. In  
470 comparison, the MTT assay measures the activity of one metabolic enzyme, nicotinamide  
471 adenine dinucleotide phosphate (NADPH)-dependent cellular oxidoreductase, in the cells  
472 as a measure of the metabolic activity and viability. This suggests that the bioenergetic  
473 parameters of the cell measured using extracellular flux analysis are more sensitive than  
474 the MTT assay.

475

476 **Clustering of the effects of anti-TB drugs on hMDM cytokine production resembles**  
477 **that observed in the hMDM bioenergetic parameters**

478 As metabolism has been demonstrated to be intricately related to immunity(67), we  
479 investigated the effects of the anti-TB drugs on the cytokine production of the hMDMs.  
480 To determine the effects of the anti-TB drugs on the function of the macrophages, the  
481 cytokine production of hMDMs after treatment with the two highest concentrations of each  
482 drug was assessed in a multiplex assay. Hierarchical cluster analysis of the cytokine  
483 production of the drug-treated hMDMs relative to the untreated hMDMs was performed.  
484 [Fig. 7](#) shows a heat map of the z-normalization values where rows (drugs and their  
485 concentrations) and columns (cytokines) have been clustered based on their correlation  
486 hierarchical clustering or similarities, using the average linkage method.

487 As observed in the hierarchical clustering of the bioenergetic parameters ([Fig. 3D](#))  
488 and the PCA analysis ([Fig. 5B](#)) of the hMDMs treated with anti-TB drugs, the effects of  
489 the INH and RIF on the cytokine production clustered together reducing the z-  
490 normalization values of the cytokine production below the average of all the drugs  
491 investigated ([Fig. 7, box a](#)). The only exceptions are the z-normalization values of IL-1ra  
492 and GM-CSF, which were increased above average in the case of IL-1ra with only slight  
493 increments in GM-CSF. IL-1ra is the IL-1 receptor antagonist and it inhibits the pro-  
494 inflammatory action of IL-1 (68). Linked to the effects of INH and RIF, are the effects of  
495 BDQ and CFZ that cluster together ([Fig. 7, box b](#)). Likewise, BDQ and CFZ also reduce  
496 the z-normalization values of most of the cytokines below the average. Cytokines that  
497 were increased above the average include, IL-8 and GM-CSF by both CFZ and BDQ, IL-  
498 9 by CFZ, and slight increases in IL-13. GM-CSF stimulates the differentiation and  
499 proliferation of myeloid progenitors in the bone marrow, and induces the activation and  
500 migration of myeloid progenitors to sites of inflammation (69). IL-8 is a chemokine that  
501 attracts neutrophils to regions of inflammation and activates them. Both IL-9 and IL-13

502 are Th2 cytokines that inhibit the pro-inflammatory response (70, 71), but IL-9 promotes  
503 mast cell growth and function (72) and IL-13 mediates allergic inflammation and asthma<sup>5</sup>.

504 These two clusters mentioned above are linked to the clustered effects of EMB  
505 and MXF on the hMDM cytokine production. These drugs induce both a decrease and  
506 an increase the z-normalization values above average, with a particularly high induction  
507 of the z-normalization values of IL-6 and IL-13. EMB also increases the values of IL-12,  
508 a pro-inflammatory cytokine (Fig. 7, box c). The clustering of cytokine production resulting  
509 from treatment of the hMDM cells with EMB and MXF is supported by the hierarchical  
510 clustering of the effects of EMB and MXF on the bioenergetic parameters of the hMDM  
511 cells (Fig. 3D, box d) and the clustering observed in the PCA analysis of the effects of  
512 MXF and EMB on the bioenergetic parameters of the hMDM (Fig. 5B). LZD clusters on  
513 its own because it increases the z-normalization values of different cytokines, in particular  
514 IL-7 and IL-10 at 50x MIC, with slight increases in VEGF and IL-1 $\beta$  (Fig. 7, box d). This  
515 also correlates with the distinct clustering of the effects of all four concentrations of LZD  
516 on the bioenergetic parameters of the hMDM cells in the PCA analysis in Fig. 5B apart  
517 from the effects of the other drugs. In contrast to the previous drugs, it reduces the z-  
518 normalization values of GM-CSF. Lastly, STR and PZA cluster together with a striking  
519 inverse of the patterns of the z-normalization values observed in the previous clusters  
520 (Fig. 7, box e). These cytokines with high z-normalization values include pro-  
521 inflammatory cytokines such as IL-1 $\beta$ , IL-2, TNF- $\alpha$ , IFN- $\gamma$ , IL-17 and chemokines such as  
522 MCP-1, MIP-1 $\alpha$ , MIP-1 $\beta$  and IP-10. This suggests that STR and PZA potentially induce  
523 pro-inflammatory modulation of the macrophages. However, like LZD, STR and PZA also  
524 reduce the z-normalization values of GM-CSF.

525 In summary, the hierarchical clustering of the cytokines produced by the anti-TB  
526 drug treated hMDM cells resemble the clustering observed in the bioenergetic parameters  
527 of the drug treated hMDMs in the PCA analysis, especially in the case of RIF, INH, EMB,  
528 MXF and LZD. Interestingly, treatment of the hMDM cells with STR or PZA induce a  
529 completely different pattern of cytokine production to the other anti-TB drugs, suggesting  
530 induction of a pro-inflammatory response.

531

## 532 **Discussion**

533 High attrition rates in drug development during the clinical and post-market phases due  
534 to safety issues underscore the need for new technology to screen for “cytotoxicity” at  
535 early stages in drug development. In anti-TB drug development, current methods used  
536 to assess cytotoxicity of new chemical entities have a single endpoint measurement as  
537 an indicator of cell viability, which does not reflect earlier events of distress induced by  
538 the compounds in the absence of cell death. Here, we adopted a multi-well non-invasive  
539 extracellular flux analysis platform that rapidly detects the modulation of bioenergetic  
540 metabolism of cells induced by anti-TB drugs in real-time prior to cell death that is  
541 measured by conventional viability assays. This rapid detection of earlier events of anti-  
542 TB drug induced bioenergetic distress provides a novel tool to detect early toxicity  
543 affecting the health of the cells that potentially leads to cellular dysfunction, thereby  
544 reducing high attrition and costs involved in further drug development.

545 The MTT assay, and other tetrazolium reduction assays have often been used to  
546 assess the cytotoxicity of anti-TB drugs, new chemical entities, or combinations (48, 50,  
547 73-75). However, the major drawback of viability assays is that they only focus on the  
548 effects of the drugs on one aspect of metabolism, such as the generation of oxidized

549 reducing equivalents, contributing to the viability of the cells and are not sensitive enough  
550 to detect alterations to the health of the cell that would impact the functioning of the cell  
551 in the absence of cell death. Yet, it is not clear what parameters define the health of the  
552 eukaryotic cell nor how they can be measured. As energy in the form of ATP is required  
553 by all eukaryotic cells to survive and function, perturbations of bioenergetic metabolism,  
554 specifically OXPHOS and glycolysis, that cannot be compensated for by the cell, will  
555 affect both the health and functioning of the cell. Here, we demonstrate how extracellular  
556 flux analysis that measures OCR, an indirect measurement of OXPHOS, and ECAR, an  
557 indirect measurement of glycolysis, gives a non-invasive, real-time, rapid insight into how  
558 anti-TB drugs affect the bioenergetic health of the cell, in the absence of cell death. Our  
559 data reveals the increased sensitivity of the extracellular flux analysis by the greater  
560 degree of variation in the response of the bioenergetic parameters of the anti-TB drug-  
561 treated cells in comparison to the % viability as the readout of the MTT assay (Fig. 6F  
562 and G). This strongly suggests that the bioenergetic parameters detect the effect of drugs  
563 on energy metabolism at much earlier timepoints prior to cell death, which is measured  
564 by the MTT viability assay. This was supported by correlation analysis in which the MTT  
565 assay had low, in some cases, negative correlations with the bioenergetic parameters  
566 (Fig. 6A-D), together with our PCA that demonstrated the MTT % Viability generated  
567 clustered separately from all the bioenergetic parameters (Fig. 6E).

568 Mitochondrial toxicity is now widely accepted as a common mechanism underlying  
569 drug induced organ toxicities (29, 31, 76), and is being increasingly detected in early  
570 stages of drug development using extracellular flux analysis (37, 38, 42). Mitochondrial  
571 toxicity of compounds is often assessed by growing the cells in the presence of high  
572 galactose (30, 42, 57), which forces the cells to use OXPHOS to produce ATP, thereby



573 increasing the cells' sensitivity to the effects of mitochondrial toxicants compared to cells  
574 grown in glucose (77, 78). However, the glucose-galactose switch does not sensitize all  
575 cell-types to mitochondrial cytotoxicity (79). Furthermore, in our study, we used glucose  
576 in our media to allow the cells to shift to glycolysis for ATP production (as evidenced by  
577 an increase in ECAR) should the drug adversely affect mitochondrial respiration (revealed  
578 by decreased OCR). Cells which cannot increase glycolysis in response to drug-impaired  
579 mitochondrial respiration, will not be able to meet the ATP requirements of the cell, thus  
580 increasing the cell's susceptibility to adverse effects of the drug. Galactose does not allow  
581 this switch from OXPHOS to glycolysis. For this reason, we investigated the effects of  
582 the anti-TB drugs on hepatocytes, which rely more on OXPHOS, in addition to  
583 macrophages, which are more glycolytic, in the presence of glucose. Furthermore, we  
584 used the Cell Mito Stress test in the extracellular flux analysis as it has been demonstrated  
585 that the addition of the mitochondrial stressors, oligomycin, FCCP, antimycin A and  
586 rotenone, increased the sensitivity of the assay to detect mitochondrial dysfunction (36).

587         Addition of one of these stresses, FCCP, uncouples respiration from the production  
588 of ATP, resulting in maximal respiration (Max Resp) as a measure of the maximal activity  
589 of the electron transport chain (80). This enables the measurement of the SRC, which  
590 has been reported to be marker of cellular stress and mitochondrial dysfunction (81, 82).  
591 The SRC clustered separately from the other bioenergetic parameters in the hierarchical  
592 clustering of the effects of the anti-TB drugs on the bioenergetic parameters of the THP-  
593 1 cells (Fig. 3C), hMDMs (Fig. 3D) and when all three cell types were combined (Fig. 3A),  
594 demonstrating that treatment with the anti-TB drugs perturbs SRC differently to the other  
595 parameters. This is further supported by the correlation analyses of the different  
596 bioenergetic parameters, where the average Pearson's correlation co-efficient was the

597 lowest for SRC (Fig. 4A) in the THP-1 cells and hMDMs, and when the parameters of all  
598 three cell types were combined. Additionally, SRC also clustered separately from all the  
599 other bioenergetic parameters in our PCA of the bioenergetic parameters and the MTT %  
600 Viability (Fig. 6E), again reinforcing the distinctness of the SRC from the other  
601 bioenergetic parameters. Altogether, this demonstrates the high sensitivity of SRC to  
602 effects of the anti-TB drugs on the mitochondria. This has been supported by a study  
603 investigating the high throughput respirometry potential of the XF to detect mitochondrial  
604 biogenesis and toxicity (38). Known mitochondrial toxicants caused concentration-  
605 dependent depression in FCCP-uncoupled OCR with no significant decrease in the basal  
606 respiration of rabbit renal proximal tubule cells (RPTC). The authors concluded that the  
607 FCCP-uncoupled OCR can be used to uncover disrupted electron transport activity, and  
608 consequently mitochondrial damage, by toxicants even though basal metabolism is not  
609 impaired (38). As SRC is calculated from the response of OCR after addition of FCCP,  
610 our findings suggest that SRC can also be used to identify mitochondrial damage. Other  
611 studies investigating drug-induced cytotoxicity have also used FCCP-uncoupled OCR  
612 together with changes in initial OCR and ECAR in response to acute treatment or longer  
613 incubations with the drug on RPTC (78), and on RPTC and HepG2 (79) to specifically  
614 detect mitochondrial toxicity.

615 The choice of cell type to investigate cytotoxicity in drug development depends  
616 heavily on the environment, whether it be in industry or academia. Overall, we found the  
617 bioenergetic parameters of the macrophage models (THP-1 cells and hMDMs) were  
618 much more sensitive to the anti-TB drugs than the HepG2 cells (Table S1). This may be  
619 due to HepG2 cells having a greater SRC than the macrophages enabling them to tolerate  
620 further mitochondrial toxic insults than the macrophages with a lower SRC. This

621 increased sensitivity is underscored by the distinct clustering of the effects of the of the  
622 anti-TB drugs on the bioenergetic parameters of the THP-1 cells, followed by broader  
623 groupings in hMDM cells, and the least distinction in the HepG2 cells (Fig. 5). These  
624 findings suggest that cytotoxic potential of new drug leads should not be investigated on  
625 one cell type alone. Although HepG2 cells give an indication of potential hepatotoxicity  
626 of early drug leads, macrophages are important in the innate immune response to *Mtb*  
627 infection and activation of the adaptive immune response. As the metabolism of the  
628 immune cells determines the immune functions of the immune cells, any alterations of the  
629 bioenergetic metabolism by new TB drug leads indicate the potential of these drugs to  
630 attenuate the immune response to *Mtb*. Our findings strongly advocate the use of two  
631 cell types for the screening of cytotoxicity in TB drug development: the HepG2 cells for  
632 detection of drug-induced liver toxicity and a macrophage model to detect the effects of  
633 the anti-TB drugs on immune cells, which are essential for control of infection.

634 Strikingly in all three cell types, the effects of EMB or MXF on the bioenergetic  
635 parameters of the cell types either group away or cluster together from the effects of the  
636 other anti-TB drugs on the bioenergetic parameters. These two drugs are not chemically  
637 related (Fig. S3) and do not have similar mechanisms of action on *Mtb*, which importantly,  
638 suggests that cytotoxic effects cannot be predicted from structure-activity relationships.  
639 EMB is thought to inhibit the biosynthesis of the cell wall, by inhibiting  
640 arabionsyltransferase required for the synthesis of arabinogalactan and  
641 lipoarabinomannan(83), whereas MXF is a fluoroquinolone that inhibits DNA gyrase that  
642 allows the untwisting required to synthesize two DNA helices from one DNA double helix  
643 (84). This is further supported by the effects of INH and RIF on the bioenergetic  
644 parameters clustering together in both the THP-1 and hMDM cells, although they are not

645 chemically related nor have similar mechanisms of action. The clustering of the effects  
646 of EMB and MXF in addition to INH and RIF on the bioenergetic parameters of the hMDM  
647 cells were also mimicked in the hierarchical clustering of the effects of the same drugs on  
648 the levels of cytokines produced by hMDMs (Fig. 7). These findings of chemically  
649 unrelated drugs inducing similar effects on the bioenergetic parameters as well as similar  
650 patterns on hMDM cytokine production caution against associating cytotoxicity of new  
651 chemical entities with their chemical structures or mode of action against *Mtb*.

652 In conclusion, we have adopted real time extracellular flux analysis to detect early  
653 cytotoxic effects of the anti-TB drugs on the health of the cell prior to cell death by  
654 assessing the effects of the anti-TB drugs on the bioenergetic parameters of human  
655 HepG2 cells, THP-1 macrophages and hMDMs. In particular, SRC is the most sensitive  
656 measure of early mitochondrial toxicity induced by drug treatment. Interestingly, we found  
657 that chemically unrelated drugs with differing modes of action on *Mtb* cluster together in  
658 their similar effects on the bioenergetic metabolism of the cells, in particular the THP-1  
659 cells. This points to the prudence of associating chemical structure and mode of action  
660 on *Mtb* with potential cytotoxicity patterns. Furthermore, our findings strongly advocate  
661 measuring the effects of new drug leads on the bioenergetic metabolism of macrophages  
662 in addition to HepG2 cells to assess cytotoxicity as this will not only assess hepatotoxicity  
663 but will also give an early indication of the potential of the new drug leads to modulate the  
664 immune functions of immune cells that might pose a risk to controlling *Mtb* infection.  
665 Thus, these findings can be used to establish a benchmark for cytotoxicity testing in future  
666 TB drug discovery.

667

668 **Methods**

669

670 **Tissue Culture and differentiation**

671 *Human monocyte derived macrophages*

672 Peripheral blood mononuclear cells (PBMCs) were isolated from buffy coats (South  
673 African National Blood Service). Briefly, 8 ml buffy coat was diluted in 27 ml Dulbecco's  
674 phosphate buffered saline (DPBS) and overlaid onto 15 ml Histopaque® 1077. The buffy  
675 coat was separated (400 × g, 35 min, swing out bucket rotor; no acceleration, no brake).  
676 The PBMC-enriched layer was collected and washed with DPBS (1:1). PBMCs were  
677 pelleted (400 × g, 10 min) and washed in 50 ml DPBS (room temperature), then repeated  
678 with 50 ml DPBS (4°C). PBMCs were pelleted and resuspended in 5 ml separation buffer  
679 (DPBS, 2 mM EDTA, 0.5% (w/v) BSA, 4°C). CD14<sup>+</sup> monocytes were isolated by magnetic  
680 cell sorting using MACS CD14-microbeads (Miltenyi, 130-505-201) according to  
681 manufacturer's instructions. The monocytes were pelleted and resuspended in freezing  
682 solution (RPMI1640 with final concentrations of 10% (v/v) human serum, 1 mM sodium  
683 pyruvate, 10 mM HEPES, 1× non-essential amino acids, 2 mM GlutaMax™, 10% (v/v)  
684 DMSO). Monocytes were thawed in cell culture media (RPMI1640, 10% (v/v) human  
685 serum, 1 mM sodium pyruvate, 10 mM HEPES, 1× non-essential amino acids, 2 mM  
686 GlutaMax™) counted using trypan blue to assess the viability and seeded directly into  
687 XFe96 cell microtiter plates at a density of 8×10<sup>4</sup> cells per well in a volume of 80 µl. The  
688 monocytes were terminally differentiated into macrophages with 100 ng/ml GM-CSF for  
689 6 days, with a media change (including the GM-CSF) on day 4. On the sixth day, the  
690 macrophages were treated with the anti-TB drugs for 24 hrs prior to extracellular flux  
691 analysis on the XFe96 and viability analysis using the MTT assay.

692

693 *THP-1 macrophages*

694 THP-1 monocytes (ATCC TIB-202) were cultured in RPMI1640 (final concentrations: 10%  
695 (v/v) FBS, 25 mM D-glucose, 10 mM HEPES, 1 mM sodium pyruvate, 2 mM L-Glutamax,  
696 0.05 mM  $\beta$ -mercaptoethanol) under standard tissue culture conditions (37°C, 5% CO<sub>2</sub>).  
697 Cells were washed in fresh media, counted, and seeded in the XFe96 cell culture plate at  
698 a density of 100 000 cells per well in 80  $\mu$ l RPMI1640 culture media and terminally  
699 differentiated with 25 nM phorbol 12-myristate-13-acetate (PMA) for 3 days. On the fourth  
700 day, fresh media without PMA was supplied to the cells, and on the fifth day the cells were  
701 treated with the anti-TB drugs for 24 hrs.

702

703 *HepG2 cells*

704 HepG2 cells (ATCC HB-8065) were cultured in DMEM supplemented with 10% (v/v) FBS.  
705 To seed, cells were washed with warm DPBS and lifted with warm 1 $\times$  Trypsin-DPBS.  
706 Trypsin was deactivated with the addition of culture media. Cells were harvested, pelleted  
707 (400 x g, 5 min), resuspended in fresh media and seeded at a density of 25 000 cells per  
708 well in 80  $\mu$ l DMEM culture media of the XFe96 cell microtiter plate. Cells adhered  
709 naturally overnight, followed by 24 hrs treatment with the anti-TB drugs.

710

711 **Anti-TB drug treatment and Agilent Seahorse Cell Mito Stress Test (CMST)**

712 Stock solutions of anti-TB drugs were prepared in DMSO or DPBS where possible ([Table](#)  
713 [1](#)). Working drug solutions were prepared in the respective media, and the final  
714 concentration of DMSO per well did not exceed 0.2% (v/v), except for the highest  
715 concentrations (50x and 100x MIC) of clofazimine and linezolid (0.5% and 1% (v/v)), in

716 which case 0.5% and 1% DMSO controls were included in the assays. Following seeding  
717 and/or differentiation of each cell type, the supernatant was aspirated, and the cells were  
718 treated with four concentrations of each anti-TB drug: 1x, 10x, 50x and 100x the MIC  
719 values in [Table 1](#) in 8 replicates for 24 hrs in a total volume of 80  $\mu$ l/well. Cells were also  
720 treated with two drug combinations: (1) INH, RIF, PZA, EMB and STR, or (2) INH & RIF  
721 at 1x and 10x MIC of all the drugs in the combination for 24 hrs. The following day, the  
722 cells were washed twice with CMST media (DMEM, 30 mM NaCl, 5 mM HEPES, 2 mM  
723 L-Glutamax, 1 mM sodium pyruvate, pH 7.4) and the final volume was brought up to 180  
724  $\mu$ l with CMST media. The media in the cell plate was degassed for a minimum of 30 min  
725 in a non-CO<sub>2</sub> incubator. The mitochondrial modulators oligomycin, carbonyl cyanide-4  
726 (trifluoromethoxy) phenylhydrazone (FCCP), rotenone and antimycin A were prepared in  
727 CMST media from DMSO stocks at 10x the concentrations given in [Table 2](#). The pH of  
728 the solutions was adjusted to 7.4 at 37°C and loaded into the ports of the XFe96 cartridge  
729 as indicated in [Table 2](#) (85, 86). The extracellular flux of the cells was analyzed on an  
730 XFe96 using the Cell Mito Stress Test (CMST) protocol with 3 minutes of mixing and 4-  
731 minute measurements.

732

### 733 **Normalization of extracellular flux by protein concentration**

734 Following XFe96 analysis, the supernatants were aspirated from all the wells leaving  
735 behind approximately 10  $\mu$ l of the supernatant in each well, and the cells were fixed with  
736 the addition of 10  $\mu$ l formalin/well. The cells in each well were lysed by adding 20  $\mu$ l 25  
737 mM NaOH/well. BSA standards (5  $\mu$ l) were added to the control wells without cells (Lanes  
738 1 and 12) ranging from 0.125 – 2 mg/ml (BioRad 500-0202) and treated with formalin and  
739 NaOH at the same concentrations as the cells. Bradford reagent (150  $\mu$ l, BioRad 500-

740 0205) were added to all the wells, and the plate was incubated in the dark for 5 min. The  
741 absorbance of each well was measured at 595 nm using a Biotek Synergy H4 Hybrid  
742 spectrophotometer and the standard curve generated from the BSA standards in lanes 1  
743 and 12 was used to calculate the protein concentrations of each well. These protein  
744 concentrations were used to normalize the bioenergetic parameter data (OCR and ECAR)  
745 were normalized using the protein concentration in the Agilent Seahorse Wave desktop  
746 software (version 2.6). The CMST assay parameters were calculated using the Agilent  
747 Seahorse Biosciences Cell Mito Stress Test Report Generator.

748

#### 749 **MTT viability assay**

750 To assess the viability of the cells under the identical conditions used for the extracellular  
751 flux analysis, the cells were seeded into XFe96 cell microtiter plates and treated as for  
752 the XFe96 assay. Media in lanes 1 and 12 of the microtiter plate served as the negative  
753 controls. The MTT reagent (3-(4,5-dimethylthiazol-2-yl)-2,5-diphenyltetrazolium bromide;  
754 Invitrogen M6494) was prepared and the assay was performed according to  
755 manufacturer's instructions. Briefly, after overnight drug treatments, the supernatant was  
756 aspirated, leaving 25  $\mu$ l of supernatant behind to avoid lifting the cells. The volume was  
757 bought up to 100  $\mu$ l with the appropriate media, and 10  $\mu$ l of MTT reagent (5 mg/ml in  
758 DPBS) was added to each well, and incubated for 4 hours (37°C, 5% CO<sub>2</sub>). Supernatant  
759 was aspirated and the formazan crystals was dissolved with 50  $\mu$ l DMSO in each well  
760 followed by 10 min incubation at room temperature. The absorbance of each well at 540  
761 nm was measured using the Biotek Synergy after mixing by trituration. The percentage  
762 viability of the cells was calculated as follows:



763 
$$\% Viability = \frac{\text{mean OD drug treated cells} - \text{mean OD of negative control}}{\text{mean OD of untreated cells} - \text{mean of negative control}} \times 100$$

764

### 765 **Cytokine measurements in the culture supernatant fluid**

766 Culture supernatant was collected from the hMDM cells treated with the anti-TB drugs for  
767 24 hrs prior to XF runs and stored at -80 °C. The cytokine levels were measured using  
768 the magnetic bead-based Bio-Plex Pro Human cytokine 27-Plex (Bio-Rad) according to  
769 manufacturer's instructions and measured the cytokines using the Bio-Plex 200  
770 instrument. Using the Bio-Plex Manager Software and standard curves of each cytokine,  
771 the concentrations of the cytokines (pg/ml) were calculated from the median fluorescence  
772 intensity (MFI). Four replicates were used for each concentration of each anti-TB drug  
773 analyzed.

774

### 775 **Statistical analyses**

776 Two-way ANOVA was performed using GraphPad Prism for the bioenergetic parameters.  
777 Principle components analyses (PCA), Hierarchical clustering (heatmap), and Pearson's  
778 correlation were performed using software package Partek Genomic Suite (PGS, Partek,  
779 MO, US. Partek.com) according to factory settings and user manual. P-values less than  
780 0.05 was considered significant. Briefly, z-normalization was performed before  
781 hierarchical clustering. Euclidean dissimilar matrix and average linkage similarity were  
782 used. In PCA analysis, all variables have assumed having equal influence on principle  
783 components (PC).

784

### 785 **Acknowledgements**

786 This work was supported by NIH Grants R01AI134810, R01AI137043, R01AI152110,  
787 R33AI138280, a Bill and Melinda Gates Foundation Award (OPP1130017), the South  
788 African (SA) Medical Research Council and a SA NRF BRICS Multilateral grant to  
789 A.J.C.S.

790

## 791 References

- 792 1. Arbex MA, Varella Mde C, Siqueira HR, Mello FA. 2010. Antituberculosis drugs: drug  
793 interactions, adverse effects, and use in special situations. Part 1: first-line drugs. *J Bras*  
794 *Pneumol* 36:626-40.
- 795 2. Girling DJ. 1978. The hepatic toxicity of antituberculosis regimens containing isoniazid,  
796 rifampicin and pyrazinamide. *Tubercle* 59:13-32.
- 797 3. Tostmann A, Boeree MJ, Aarnoutse RE, de Lange WC, van der Ven AJ, Dekhuijzen R.  
798 2008. Antituberculosis drug-induced hepatotoxicity: concise up-to-date review. *J*  
799 *Gastroenterol Hepatol* 23:192-202.
- 800 4. van der Watt JJ, Harrison TB, Benatar M, Heckmann JM. 2011. Polyneuropathy, anti-  
801 tuberculosis treatment and the role of pyridoxine in the HIV/AIDS era: a systematic review.  
802 *Int J Tuberc Lung Dis* 15:722-8.
- 803 5. Marks DJ, Dheda K, Dawson R, Ainslie G, Miller RF. 2009. Adverse events to  
804 antituberculosis therapy: influence of HIV and antiretroviral drugs. *Int J STD AIDS* 20:339-  
805 45.
- 806 6. Sekaggya-Wiltshire C, von Braun A, Scherrer AU, Manabe YC, Buzibye A, Muller D,  
807 Ledergerber B, Gutteck U, Corti N, Kambugu A, Byakika-Kibwika P, Lamorde M,  
808 Castelnovo B, Fehr J, Kanya MR. 2017. Anti-TB drug concentrations and drug-  
809 associated toxicities among TB/HIV-coinfected patients. *J Antimicrob Chemother*  
810 72:1172-1177.
- 811 7. Garg P, Garg R, Prasad R, Mishra AK. 2015. A prospective study of ocular toxicity in  
812 patients receiving ethambutol as a part of directly observed treatment strategy therapy.  
813 *Lung India* 32:16-9.
- 814 8. Griffith DE, Brown-Elliott BA, Shepherd S, McLarty J, Griffith L, Wallace RJ, Jr. 2005.  
815 Ethambutol ocular toxicity in treatment regimens for Mycobacterium avium complex lung  
816 disease. *Am J Respir Crit Care Med* 172:250-3.
- 817 9. Makunyane P, Mathebula S. 2016. Update on ocular toxicity of ethambutol. 2016 75.
- 818 10. Yang TW, Park HO, Jang HN, Yang JH, Kim SH, Moon SH, Byun JH, Lee CE, Kim JW,  
819 Kang DH. 2017. Side effects associated with the treatment of multidrug-resistant  
820 tuberculosis at a tuberculosis referral hospital in South Korea: A retrospective study.  
821 *Medicine (Baltimore)* 96:e7482.
- 822 11. Huth ME, Ricci AJ, Cheng AG. 2011. Mechanisms of aminoglycoside ototoxicity and  
823 targets of hair cell protection. *Int J Otolaryngol* 2011:937861.
- 824 12. Seddon JA, Godfrey-Faussett P, Jacobs K, Ebrahim A, Hesselting AC, Schaaf HS. 2012.  
825 Hearing loss in patients on treatment for drug-resistant tuberculosis. *Eur Respir J* 40:1277-  
826 86.
- 827 13. Dauby N, Payen MC. 2010. Amikacin-induced hypomagnesaemic tetany complicating  
828 multidrug-resistant tuberculosis treatment. *Int J Tuberc Lung Dis* 14:657-8.
- 829 14. Shin S, Furin J, Alcantara F, Hyson A, Joseph K, Sanchez E, Rich M. 2004. Hypokalemia  
830 among patients receiving treatment for multidrug-resistant tuberculosis. *Chest* 125:974-  
831 80.
- 832 15. Tome AM, Filipe A. 2011. Quinolones: review of psychiatric and neurological adverse  
833 reactions. *Drug Saf* 34:465-88.
- 834 16. Kushner JM, Peckman HJ, Snyder CR. 2001. Seizures associated with fluoroquinolones.  
835 *Ann Pharmacother* 35:1194-8.
- 836 17. Kass JS, Shandera WX. 2010. Nervous system effects of antituberculosis therapy. *CNS*  
837 *Drugs* 24:655-67.
- 838 18. Kwon HM, Kim HK, Cho J, Hong YH, Nam H. 2008. Cycloserine-induced encephalopathy:  
839 evidence on brain MRI. *Eur J Neurol* 15:e60-1.

- 840 19. Bressler AM, Zimmer SM, Gilmore JL, Somani J. 2004. Peripheral neuropathy associated  
841 with prolonged use of linezolid. *Lancet Infect Dis* 4:528-31.
- 842 20. Nambiar S, Rellosa N, Wassel RT, Borders-Hemphill V, Bradley JS. 2011. Linezolid-  
843 associated peripheral and optic neuropathy in children. *Pediatrics* 127:e1528-32.
- 844 21. Vinh DC, Rubinstein E. 2009. Linezolid: a review of safety and tolerability. *J Infect* 59  
845 Suppl 1:S59-74.
- 846 22. Anonymous. 1968. Comparison of the clinical usefulness of ethionamide and  
847 prothionamide in initial treatment of tuberculosis: tenth series of controlled trials. *Tubercle*  
848 49:281-90.
- 849 23. Anonymous. 1968. A comparison of the toxicity of prothionamide and ethionamide: a  
850 report from the research committee of the British Tuberculosis Association. *Tubercle*  
851 49:125-35.
- 852 24. Drucker D, Eggo MC, Salit IE, Burrow GN. 1984. Ethionamide-induced goitrous  
853 hypothyroidism. *Ann Intern Med* 100:837-9.
- 854 25. Chakraborty S, Rhee KY. 2015. Tuberculosis Drug Development: History and Evolution of  
855 the Mechanism-Based Paradigm. *Cold Spring Harb Perspect Med* 5:a021147.
- 856 26. Riss T, F M, AL N, S D, HA B, TJ W, L M. 2013 May 1 [Updated 2016 July 1]. Cell Viability  
857 Assays. *In* S M, GS S, A G (ed), *The Assay Guidance Manual* [Internet], vol 2004. Eli Lilly  
858 & Company and the National Center for Advancing Translational Sciences, Bethesda  
859 (MD).
- 860 27. Hay M, Thomas DW, Craighead JL, Economides C, Rosenthal J. 2014. Clinical  
861 development success rates for investigational drugs. *Nat Biotechnol* 32:40-51.
- 862 28. Kola I, Landis J. 2004. Can the pharmaceutical industry reduce attrition rates? *Nat Rev*  
863 *Drug Discov* 3:711-5.
- 864 29. Dykens JA, Will Y. 2007. The significance of mitochondrial toxicity testing in drug  
865 development. *Drug Discov Today* 12:777-85.
- 866 30. Eakins J, Bauch C, Woodhouse H, Park B, Bevan S, Dilworth C, Walker P. 2016. A  
867 combined in vitro approach to improve the prediction of mitochondrial toxicants. *Toxicol In*  
868 *Vitro* 34:161-170.
- 869 31. Nadanaciva S, Will Y. 2011. New insights in drug-induced mitochondrial toxicity. *Curr*  
870 *Pharm Des* 17:2100-12.
- 871 32. Grunig D, Felser A, Bouitbir J, Krahenbuhl S. 2017. The catechol-O-methyltransferase  
872 inhibitors tolcapone and entacapone uncouple and inhibit the mitochondrial respiratory  
873 chain in HepaRG cells. *Toxicol In Vitro* 42:337-347.
- 874 33. Longo DM, Yang Y, Watkins PB, Howell BA, Siler SQ. 2016. Elucidating Differences in  
875 the Hepatotoxic Potential of Tolcapone and Entacapone With DILIsym((R)), a Mechanistic  
876 Model of Drug-Induced Liver Injury. *CPT Pharmacometrics Syst Pharmacol* 5:31-9.
- 877 34. Will Y, Shields JE, Wallace KB. 2019. Drug-Induced Mitochondrial Toxicity in the Geriatric  
878 Population: Challenges and Future Directions. *Biology (Basel)* 8.
- 879 35. Nicholls DG, Darley-Usmar VM, Wu M, Jensen PB, Rogers GW, Ferrick DA. 2010.  
880 Bioenergetic profile experiment using C2C12 myoblast cells. *J Vis Exp* 46:e2511.
- 881 36. Tilmant K, Gerets H, De Ron P, Hanon E, Bento-Pereira C, Atienzar FA. 2018. In vitro  
882 screening of cell bioenergetics to assess mitochondrial dysfunction in drug development.  
883 *Toxicol In Vitro* 52:374-383.
- 884 37. Nadanaciva S, Rana P, Beeson GC, Chen D, Ferrick DA, Beeson CC, Will Y. 2012.  
885 Assessment of drug-induced mitochondrial dysfunction via altered cellular respiration and  
886 acidification measured in a 96-well platform. *J Bioenerg Biomembr* 44:421-37.
- 887 38. Beeson CC, Beeson GC, Schnellmann RG. 2010. A high-throughput respirometric assay  
888 for mitochondrial biogenesis and toxicity. *Anal Biochem* 404:75-81.

- 889 39. Kalghatgi S, Spina CS, Costello JC, Liesa M, Morones-Ramirez JR, Slomovic S, Molina  
890 A, Shirihai OS, Collins JJ. 2013. Bactericidal antibiotics induce mitochondrial dysfunction  
891 and oxidative damage in Mammalian cells. *Sci Transl Med* 5:192ra85.
- 892 40. Ferrick DA, Neilson A, Beeson C. 2008. Advances in measuring cellular bioenergetics  
893 using extracellular flux. *Drug Discov Today* 13:268-74.
- 894 41. Porceddu M, Buron N, Roussel C, Labbe G, Fromenty B, Borgne-Sanchez A. 2012.  
895 Prediction of liver injury induced by chemicals in human with a multiparametric assay on  
896 isolated mouse liver mitochondria. *Toxicol Sci* 129:332-45.
- 897 42. Wang R, Novick SJ, Mangum JB, Queen K, Ferrick DA, Rogers GW, Stimmel JB. 2015.  
898 The acute extracellular flux (XF) assay to assess compound effects on mitochondrial  
899 function. *J Biomol Screen* 20:422-9.
- 900 43. Dykens JA, Jamieson JD, Marroquin LD, Nadanaciva S, Xu JJ, Dunn MC, Smith AR, Will  
901 Y. 2008. In vitro assessment of mitochondrial dysfunction and cytotoxicity of nefazodone,  
902 trazodone, and buspirone. *Toxicol Sci* 103:335-45.
- 903 44. Alhajala HS, Markley JL, Kim JH, Al-Gizawiy MM, Schmainda KM, Kuo JS, Chitambar CR.  
904 2020. The cytotoxicity of gallium maltolate in glioblastoma cells is enhanced by metformin  
905 through combined action on mitochondrial complex 1. *Oncotarget* 11:1531-1544.
- 906 45. Bergamini C, Moruzzi N, Volta F, Faccioli L, Gerdes J, Mondardini MC, Fato R. 2016. Role  
907 of mitochondrial complex I and protective effect of CoQ10 supplementation in propofol  
908 induced cytotoxicity. *J Bioenerg Biomembr* 48:413-23.
- 909 46. Xiao Y, Xiong T, Meng X, Yu D, Xiao Z, Song L. 2019. Different influences on mitochondrial  
910 function, oxidative stress and cytotoxicity of antibiotics on primary human neuron and cell  
911 lines. *J Biochem Mol Toxicol* 33:e22277.
- 912 47. Elmorsy E, Attalla SM, Fikry E, Kocon A, Turner R, Christie D, Warren A, Nwidu LL, Carter  
913 WG. 2017. Adverse effects of anti-tuberculosis drugs on HepG2 cell bioenergetics. *Hum*  
914 *Exp Toxicol* 36:616-625.
- 915 48. Singh M, Sasi P, Rai G, Gupta VH, Amarapurkar D, Wangikar PP. 2011. Studies on  
916 cytotoxicity of antitubercular drugs namely isoniazid, rifampicin, and pyrazinamide in an in  
917 vitro model of HepG2 cell line. *Medicinal Chemistry Research* 20:1611-1615.
- 918 49. Alves AD, Cavaco JS, Guerreiro F, Lourenco JP, Rosa da Costa AM, Grenha A. 2016.  
919 Inhalable Antitubercular Therapy Mediated by Locust Bean Gum Microparticles.  
920 *Molecules* 21.
- 921 50. Kapoor E, Tripathi V, Kumar V, Juyal V, Bhagat S, Ram V. 2014. Cyto-genotoxicity  
922 Assessment of Potential Anti-tubercular Drug Candidate Molecule-trans-cyclohexane-1,  
923 4-diamine Derivative-9u in Human Lung Epithelial Cells A549. *Toxicol Int* 21:69-77.
- 924 51. Patil-Gadhe AA, Kyadarkunte AY, Pereira M, Jejurikar G, Patole MS, Risbud A, Pokharkar  
925 VB. 2014. Rifapentine-proliposomes for inhalation: in vitro and in vivo toxicity. *Toxicol Int*  
926 21:275-82.
- 927 52. Ryndak MB, Laal S. 2019. Mycobacterium tuberculosis Primary Infection and  
928 Dissemination: A Critical Role for Alveolar Epithelial Cells. *Front Cell Infect Microbiol*  
929 9:299.
- 930 53. Pick N, Cameron S, Arad D, Av-Gay Y. 2004. Screening of Compounds Toxicity against  
931 Human Monocytic cell line-THP-1 by Flow Cytometry. *Biol Proced Online* 6:220-225.
- 932 54. Zheng X, Av-Gay Y. 2017. System for Efficacy and Cytotoxicity Screening of Inhibitors  
933 Targeting Intracellular Mycobacterium tuberculosis. *J Vis Exp* doi:10.3791/55273.
- 934 55. Grzelak EM, Choules MP, Gao W, Cai G, Wan B, Wang Y, McAlpine JB, Cheng J, Jin Y,  
935 Lee H, Suh JW, Pauli GF, Franzblau SG, Jaki BU, Cho S. 2019. Strategies in anti-  
936 Mycobacterium tuberculosis drug discovery based on phenotypic screening. *J Antibiot*  
937 (Tokyo) 72:719-728.
- 938 56. Mosmann T. 1983. Rapid colorimetric assay for cellular growth and survival: application  
939 to proliferation and cytotoxicity assays. *J Immunol Methods* 65:55-63.



- 940 57. Kamalian L, Chadwick AE, Bayliss M, French NS, Monshouwer M, Snoeys J, Park BK.  
941 2015. The utility of HepG2 cells to identify direct mitochondrial dysfunction in the absence  
942 of cell death. *Toxicol In Vitro* 29:732-40.
- 943 58. Vijayan V, Pradhan P, Braud L, Fuchs HR, Gueler F, Motterlini R, Foresti R, Immenschuh  
944 S. 2019. Human and murine macrophages exhibit differential metabolic responses to  
945 lipopolysaccharide - A divergent role for glycolysis. *Redox Biol* 22:101147.
- 946 59. Denis M. 1994. Human monocytes/macrophages: NO or no NO? *J Leukoc Biol* 55:682-4.
- 947 60. Spiller K, Ozpinar E, Romero-Torres S, Pallotta I, Kubinski P, Witherel C, Panicker L,  
948 Feldman R, Urbanska A, Santambrogio L, Vunjak-Novakovic G, Freytes D. 2015.  
949 Differential Gene Expression in Human, Murine, and Cell Line-derived Macrophages upon  
950 Polarization. *Experimental cell research* 347.
- 951 61. Michelucci A, Cordes T, Ghelfi J, Pailot A, Reiling N, Goldmann O, Binz T, Wegner A,  
952 Tallam A, Rausell A, Buttini M, Linster CL, Medina E, Balling R, Hiller K. 2013. Immune-  
953 responsive gene 1 protein links metabolism to immunity by catalyzing itaconic acid  
954 production. *Proc Natl Acad Sci U S A* 110:7820-5.
- 955 62. Eldholm V, Balloux F. 2016. Antimicrobial Resistance in *Mycobacterium tuberculosis*: The  
956 Odd One Out. *Trends Microbiol* 24:637-648.
- 957 63. Smith T, Wolff KA, Nguyen L. 2012. Molecular Biology of Drug Resistance in  
958 *Mycobacterium tuberculosis*, p 53-80. *In* Pieters J, McKinney J (ed), *Pathogenesis of*  
959 *Mycobacterium tuberculosis and its interaction with the Host Organism*, vol 374. Springer,  
960 Berlin, Heidelberg.
- 961 64. WHO. 2017. Guidelines for treatment of drug-susceptible tuberculosis and patient care,  
962 2017 update. World Health Organisation, Geneva.
- 963 65. Mookerjee SA, Goncalves RL, Gerencser AA, Nicholls DG, Brand MD. 2015. The  
964 contributions of respiration and glycolysis to extracellular acid production. *Biochim*  
965 *Biophys Acta* 1847:171-81.
- 966 66. Johnson RA, Wichern DW. 2007. *Applied Multivariate Statistical Analysis*. Pearson  
967 Prentice Hall.
- 968 67. Ramalho R, Rao M, Zhang C, Agrati C, Ippolito G, Wang FS, Zumla A, Maeurer M. 2020.  
969 Immunometabolism: new insights and lessons from antigen-directed cellular immune  
970 responses. *Semin Immunopathol* 42:279-313.
- 971 68. Arend WP, Guthridge CJ. 2000. Biological role of interleukin 1 receptor antagonist  
972 isoforms. *Annals of the Rheumatic Diseases* 59:i60-i64.
- 973 69. Lotfi N, Thome R, Rezaei N, Zhang G-X, Rezaei A, Rostami A, Esmaeil N. 2019. Roles of  
974 GM-CSF in the Pathogenesis of Autoimmune Diseases: An Update. *Frontiers in*  
975 *Immunology* 10.
- 976 70. Chakraborty S, Kubatzky KF, Mitra DK. 2019. An Update on Interleukin-9: From Its Cellular  
977 Source and Signal Transduction to Its Role in Immunopathogenesis. *Int J Mol Sci* 20.
- 978 71. Wynn TA. 2003. IL-13 effector functions. *Annu Rev Immunol* 21:425-56.
- 979 72. Soussi-Gounni A, Kontolemos M, Hamid Q. 2001. Role of IL-9 in the pathophysiology of  
980 allergic diseases. *J Allergy Clin Immunol* 107:575-82.
- 981 73. Fatima R, Ashraf M, Ejaz S, Rasheed MA, Altaf I, Afzal M, Batool Z, Saleem U, Anwar K.  
982 2013. In vitro toxic action potential of anti tuberculosis drugs and their combinations.  
983 *Environ Toxicol Pharmacol* 36:501-513.
- 984 74. Tostmann A, Boeree MJ, Peters WH, Roelofs HM, Aarnoutse RE, van der Ven AJ,  
985 Dekhuijzen PN. 2008. Isoniazid and its toxic metabolite hydrazine induce in vitro  
986 pyrazinamide toxicity. *Int J Antimicrob Agents* 31:577-80.
- 987 75. Lamprecht DA, Finin PM, Rahman MA, Cumming BM, Russell SL, Jonnala SR, Adamson  
988 JH, Steyn AJ. 2016. Turning the respiratory flexibility of *Mycobacterium tuberculosis*  
989 against itself. *Nat Commun* 7:12393.

- 990 76. Meyer JN, Hartman JH, Mello DF. 2018. Mitochondrial Toxicity. *Toxicological Sciences*  
991 162:15-23.
- 992 77. Marroquin LD, Hynes J, Dykens JA, Jamieson JD, Will Y. 2007. Circumventing the  
993 Crabtree effect: replacing media glucose with galactose increases susceptibility of HepG2  
994 cells to mitochondrial toxicants. *Toxicol Sci* 97:539-47.
- 995 78. Wills LP, Beeson GC, Trager RE, Lindsey CC, Beeson CC, Peterson YK, Schnellmann  
996 RG. 2013. High-throughput respirometric assay identifies predictive toxicophore of  
997 mitochondrial injury. *Toxicol Appl Pharmacol* 272:490-502.
- 998 79. van der Stel W, Carta G, Eakins J, Darici S, Delp J, Forsby A, Bennekou SH, Gardner I,  
999 Leist M, Danen EHJ, Walker P, van de Water B, Jennings P. 2020. Multiparametric  
1000 assessment of mitochondrial respiratory inhibition in HepG2 and RPTEC/TERT1 cells  
1001 using a panel of mitochondrial targeting agrochemicals. *Arch Toxicol* 94:2707-2729.
- 1002 80. Schnellmann RG, Ewell FPQ, Sgambati M, Mandel LJ. 1987. Mitochondrial toxicity of 2-  
1003 bromohydroquinone in rabbit renal proximal tubules. *Toxicology and Applied*  
1004 *Pharmacology* 90:420-426.
- 1005 81. Brand MD, Nicholls DG. 2011. Assessing mitochondrial dysfunction in cells. *Biochem J*  
1006 435:297-312.
- 1007 82. Dranka BP, Hill BG, Darley-Usmar VM. 2010. Mitochondrial reserve capacity in endothelial  
1008 cells: The impact of nitric oxide and reactive oxygen species. *Free Radic Biol Med* 48:905-  
1009 14.
- 1010 83. Goude R, Amin AG, Chatterjee D, Parish T. 2009. The Arabinosyltransferase EmbC Is  
1011 Inhibited by Ethambutol in *Mycobacterium tuberculosis*. *Antimicrobial Agents*  
1012 *and Chemotherapy* 53:4138-4146.
- 1013 84. Gibson EG, Blower TR, Cacho M, Bax B, Berger JM, Osheroff N. 2018. Mechanism of  
1014 Action of *Mycobacterium tuberculosis* Gyrase Inhibitors: A Novel Class of Gyrase Poisons.  
1015 *ACS Infect Dis* 4:1211-1222.
- 1016 85. Cumming BM, Addicott KW, Adamson JH, Steyn AJ. 2018. *Mycobacterium tuberculosis*  
1017 induces decelerated bioenergetic metabolism in human macrophages. *Elife* 7.
- 1018 86. Cumming BM, Reddy VP, Steyn AJ. 2020. The Analysis of *Mycobacterium tuberculosis*-  
1019 Induced Bioenergetic Changes in Infected Macrophages Using an Extracellular Flux  
1020 Analyzer. *Methods Mol Biol* 2184:161-184.
- 1021
- 1022

1023 **Table 1. Concentrations and preparation of Anti-TB drugs**

| Anti-TB drug                    | Molecular weight (g/mol) | Concentration (1× MIC, Molarity) | Concentration (1× MIC, mass/volume) | Reported <i>in vitro</i> potency | Solvent                |
|---------------------------------|--------------------------|----------------------------------|-------------------------------------|----------------------------------|------------------------|
| Bedaquiline (BDQ)               | 671.5                    | 44.5 nM                          | 29.88 ng/ml                         |                                  | DMSO                   |
| Clofazimine (CFZ)               | 473.4                    | 0.2 µM                           | 94.63 ng/ml                         | 0.1 µg/ml                        | DMSO                   |
| Rifampicin (RIF)                | 822.94                   | 0.4845 µM                        | 398.75 ng/ml                        | 0.1 - 0.4 µg/ml                  | 30% (v/v)<br>DMSO-DPBS |
| Isoniazid (INH)                 | 137.14                   | 0.23975 µM                       | 32.88 ng/ml                         | 25 ng/ml                         | DPBS                   |
| Pyrazine carboxamide (PZA)      | 123.11                   | 0.406 mM                         | 50 µg/ml                            | 6-200 µg/ml (pH dependent)       | DPBS                   |
| Ethambutol-HCl (EMB)            | 277.23                   | 2.45 nM                          | 679.2 ng/ml                         |                                  | DPBS                   |
| Moxifloxacin-HCl (MXF)          | 437.89                   | 1.14 µM                          | 500 ng/ml                           | 0.5 µg/ml                        | DPBS                   |
| Streptomycin sulfate salt (STR) | 728.69                   | 172 nM                           | 125 ng/ml                           |                                  | DPBS<br>30% (v/v)      |
| Linezolid (LZD)                 | 337.35                   | 2.96 µM                          | 1 µg/ml                             | 0.24 µg/ml                       | DMSO-DPBS              |

1024

1025

1026



1027 **Table 2: Final concentrations of mitochondrial modulators used for CMST**

| Modulator                | Port* | Volume ( $\mu$ l) <sup>#</sup> | Concentration ( $\mu$ M) |       |       |
|--------------------------|-------|--------------------------------|--------------------------|-------|-------|
|                          |       |                                | hMDM                     | THP-1 | HepG2 |
| Oligomycin               | A     | 20                             | 1.5                      | 1.5   | 3     |
| FCCP                     | B     | 22.5                           | 1                        | 1     | 2.5   |
| Rotenone and Antimycin A | C     | 25                             | 2.5                      | 0.5   | 0.5   |

1028 \* Port on XFe96 cartridge.

1029 <sup>#</sup>Volume loaded into the port

1030

1031 **Figure Legends**

1032

1033 **Figure 1. Workflow to assess extracellular flux analysis as a platform to assess the**  
1034 **cytotoxicity of anti-TB drugs.**

1035

1036 **Figure 2. Bioenergetic parameters are calculated from the OCR and ECAR XF**  
1037 **profiles of the CMST assay.**

1038 (A) Modulators of the mitochondrial electron transport chain used to determine the  
1039 bioenergetic parameters.

1040 (B) CMST profile demonstrating measurement of associated parameters of mitochondrial  
1041 respiration.

1042 (C) ECAR profile demonstrating how basal ECAR and compensatory ECAR are  
1043 measured from the CMST assay.

1044 (D-F) Representative CMST profiles and (G-I) ECAR profiles of HepG2 cells (D, G), THP-  
1045 1 cells (E, H) and hMDMs (F, I) treated with 1x, 10x, 50x and 100x MIC INH for 24 hrs.

1046 (J-L) Bioenergetic parameters of the (J) HepG2 cells, (K) THP-1 cells, (L), hMDM cells  
1047 treated with increasing MIC of INH for 24 hrs calculated from the representative profiles  
1048 in (D-I).

1049

1050 **Figure 3. Each cell type demonstrates distinct bioenergetic fingerprints when**  
1051 **treated with anti-TB drugs.**

1052 (A-D) Heat maps of the hierarchical clustering of the z-normalization values calculated  
1053 from the relative bioenergetic parameters of (A) all cell types, (B) HepG2, (C) THP-1, and  
1054 (D) hMDM treated with the indicated concentrations of anti-TB drugs.

1055 (E-H) PCA analysis of the combined bioenergetic parameters of (E) all three cell types  
1056 (HepG2, THP-1 and hMDM), (F) HepG2 and THP-1 cells, (G) hMDM and THP-1 cells,  
1057 (H) HMDM and HepG2 cells, treated with increasing MIC concentrations of anti-TB drugs.

1058

1059 **Figure 4. Basal respiration correlates with all the bioenergetic parameters.**

1060 Heat maps of the Pearson correlation co-efficient of the averaged bioenergetic  
1061 parameters induced by anti-TB drug treatment (Left panel), and the means of the  
1062 correlation co-efficient (Right panel) of (A) all cell types, (B) HepG2 cells, (C) THP-1 cells  
1063 and (D) hMDMs treated with increasing MIC concentrations of anti-TB drugs. (Refer to  
1064 Dataset S2-S5 for the Pearson Correlation co-efficient used to plot the heat maps).

1065

1066 **Figure 5. The bioenergetic parameters can be used to distinguish the effects of**  
1067 **anti-TB drugs on the cells.**

1068 (A-C) PCA analysis of the averaged bioenergetic parameters of the (A) THP-1 cells, (B)  
1069 HMDM cells, and (C) HepG2 cells, that were treated with increasing concentrations of  
1070 anti-TB drugs demonstrating clustering of the different drug treatments. The color of the  
1071 spheres indicates different drug treatments.

1072

1073 **Figure 6. The bioenergetic parameters display a wider range of effects of the anti-**  
1074 **TB drugs than the MTT assay.**

1075 (A-D) Heat maps of the Pearson's correlation co-efficient of MTT % viability correlated  
1076 with the averaged bioenergetic parameters pairwise (left panel), and an adjacent heatmap  
1077 of the means of the correlation co-efficient (right panel) of (A) all cell types, (B) hMDMs,  
1078 (C) THP-1 cells, and (D) HepG2 cells treated with increasing MIC concentrations of anti-

1079 TB drugs. (Refer to Datasets S6-S9 for the values of the Pearson correlation co-efficient  
1080 used to plot the heat maps).

1081 (E) PCA analysis depicts separation of the cumulative MTT %viability values from the  
1082 averaged individual bioenergetic parameters.

1083 (F-K) Line plots of relative bioenergetic parameters and the MTT %Viability of the three  
1084 cell types treated with increasing MIC concentrations of (F) RIF and (G) INH.

1085

1086 **Figure 7. The anti-TB drugs alter cytokine production of the hMDM cells in a pattern**  
1087 **resembling that of the hMDM bioenergetic parameters.**

1088 Heatmap and hierarchical clustering of the z-normalization values of the cytokines  
1089 produced by hMDMs after treatment with the indicated concentrations of the anti-TB  
1090 drugs.

1091

# Figure 1

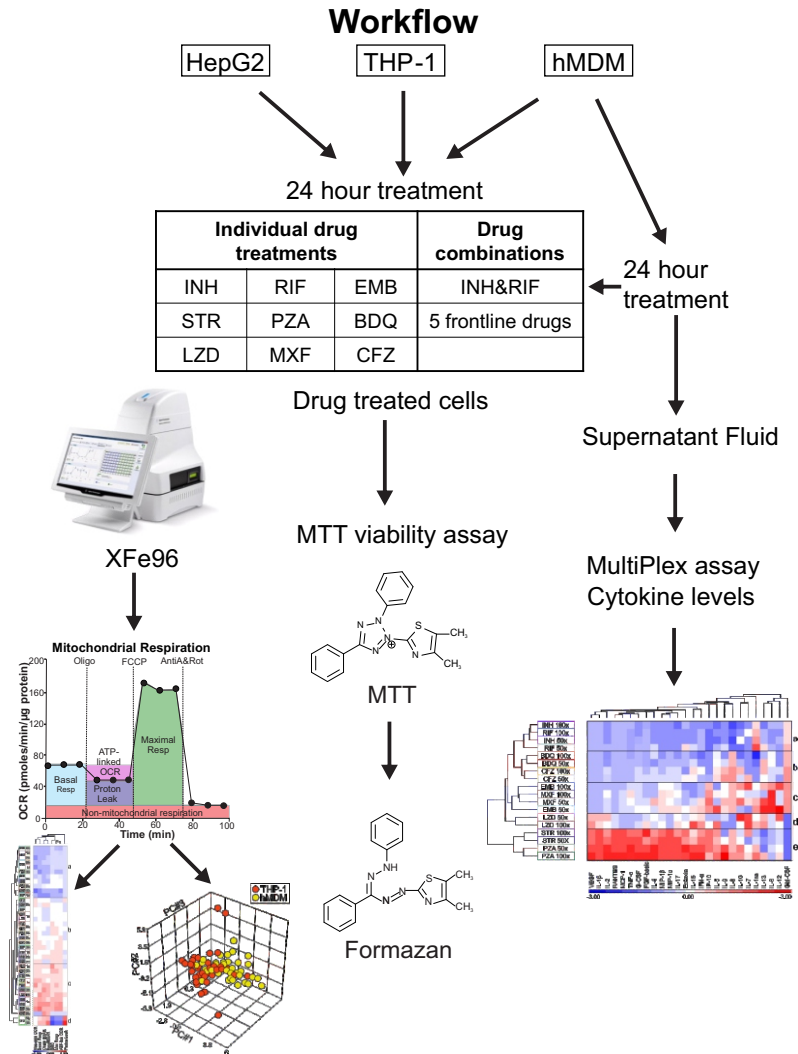

# Figure 2

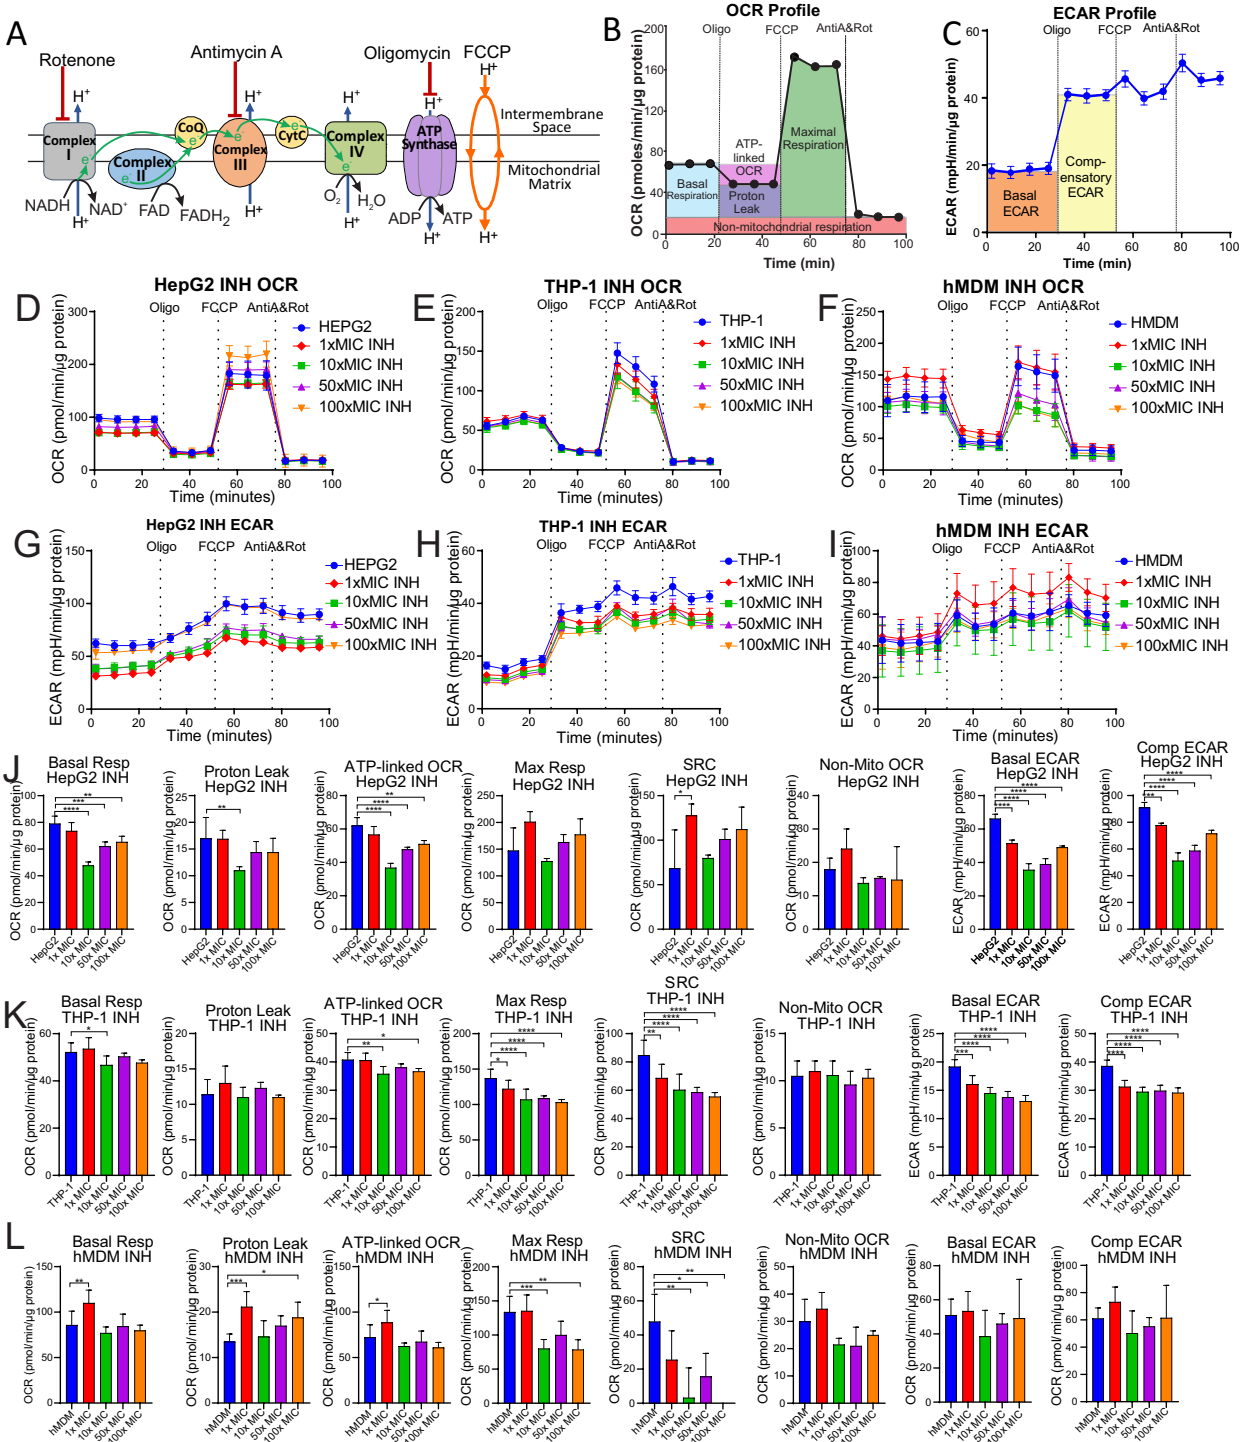

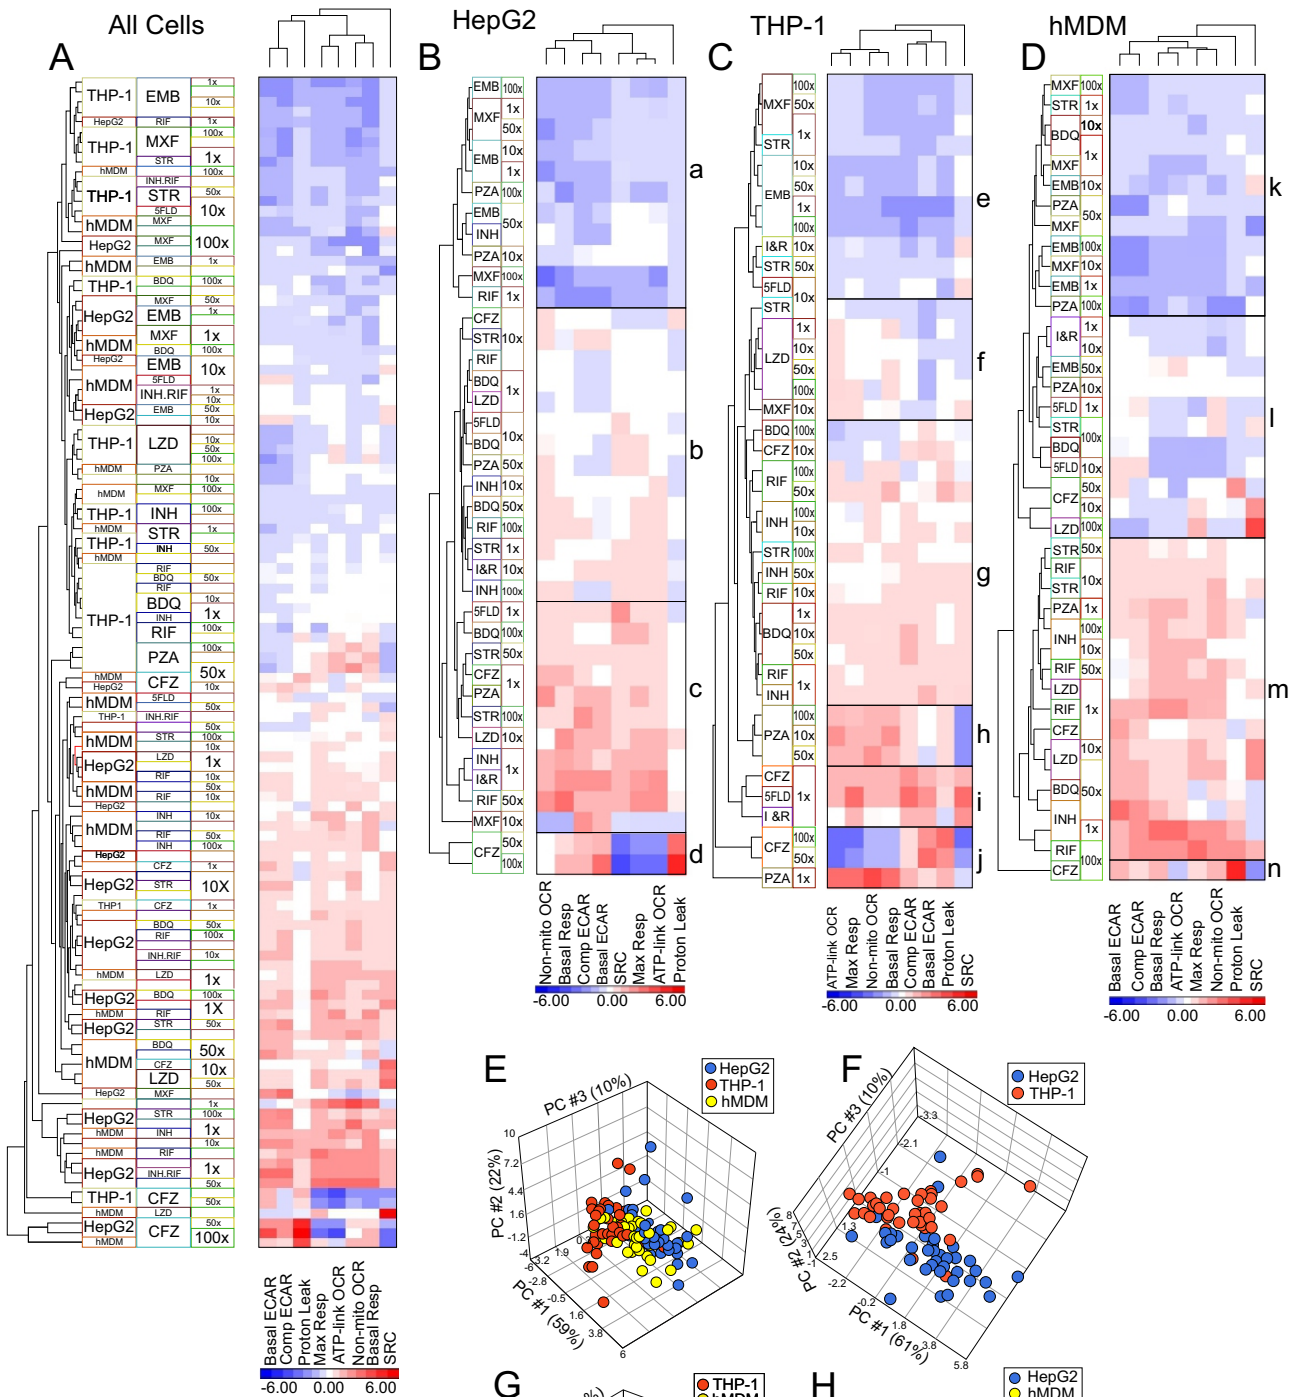

Figure 3

# Figure 4

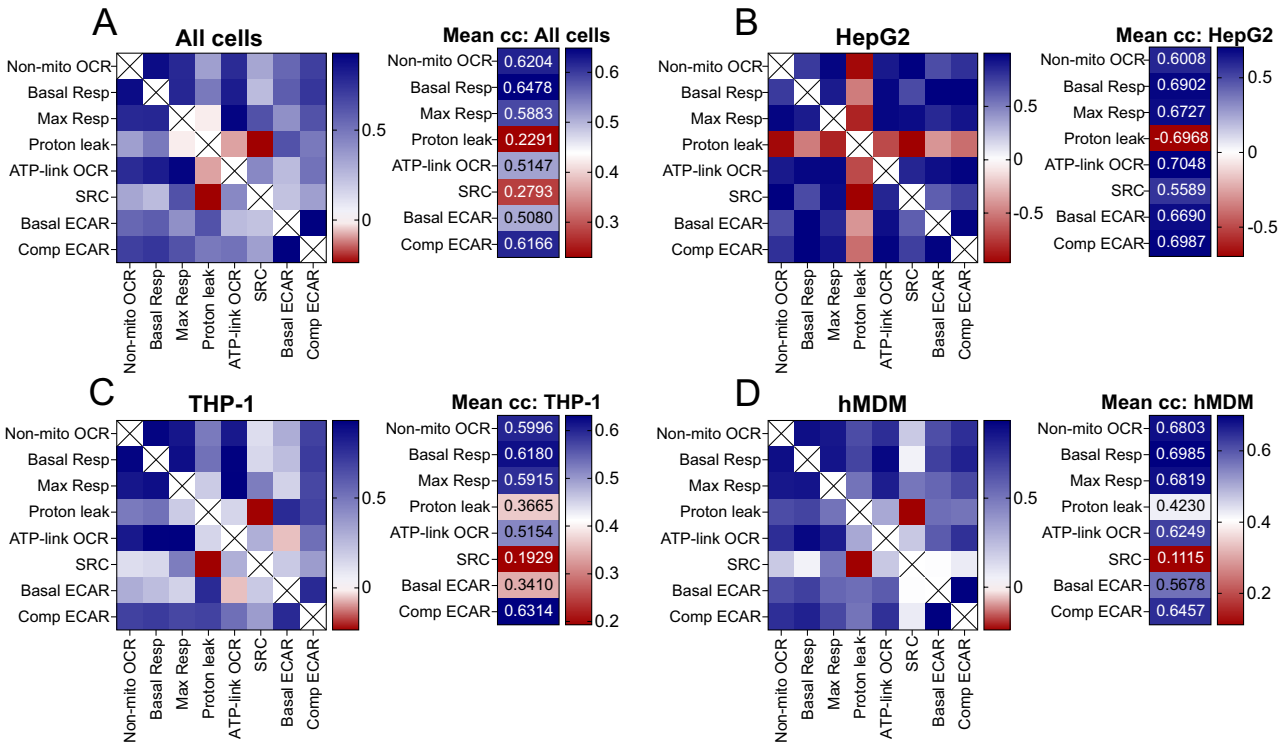



Figure 5

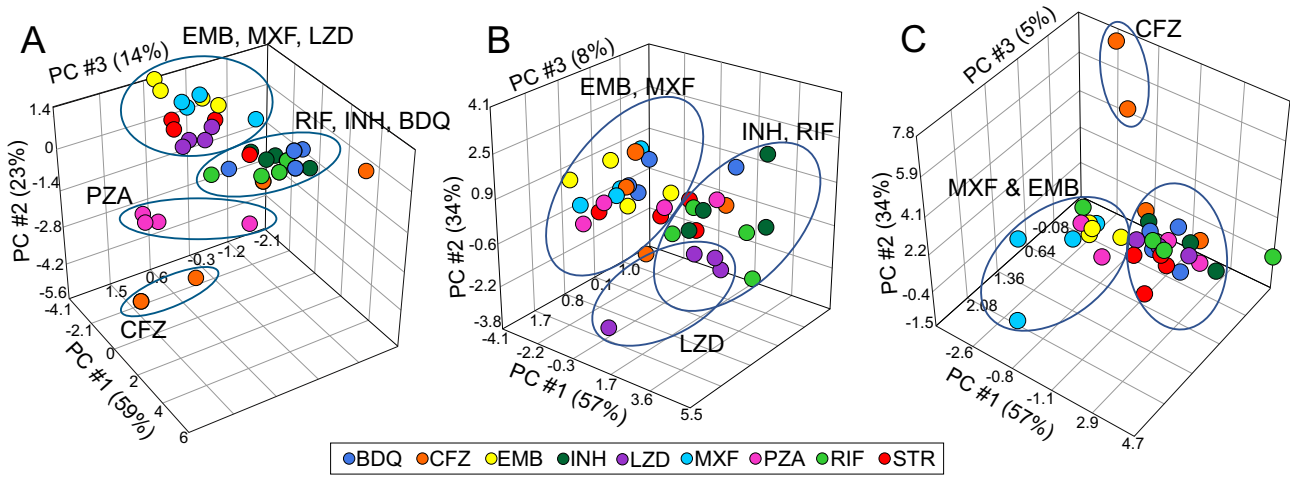

# Figure 6

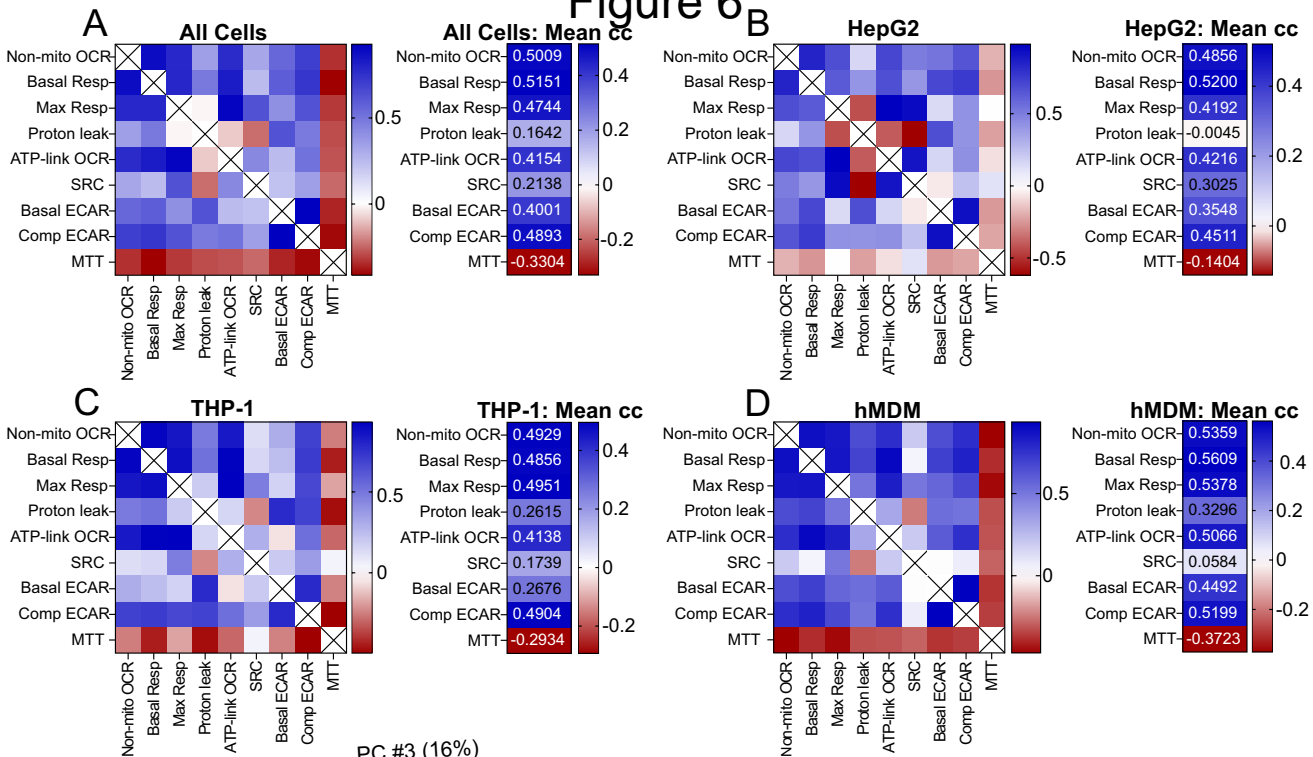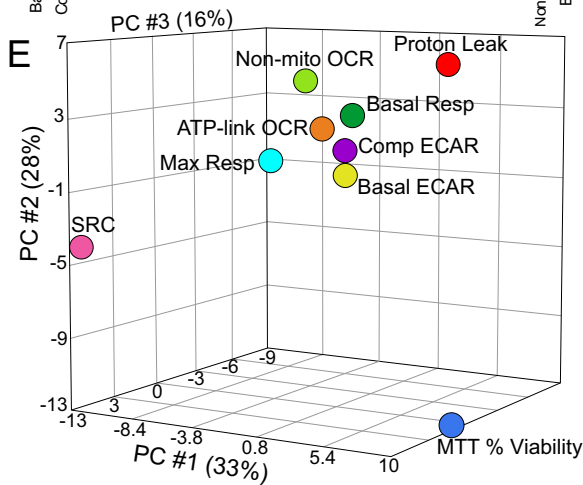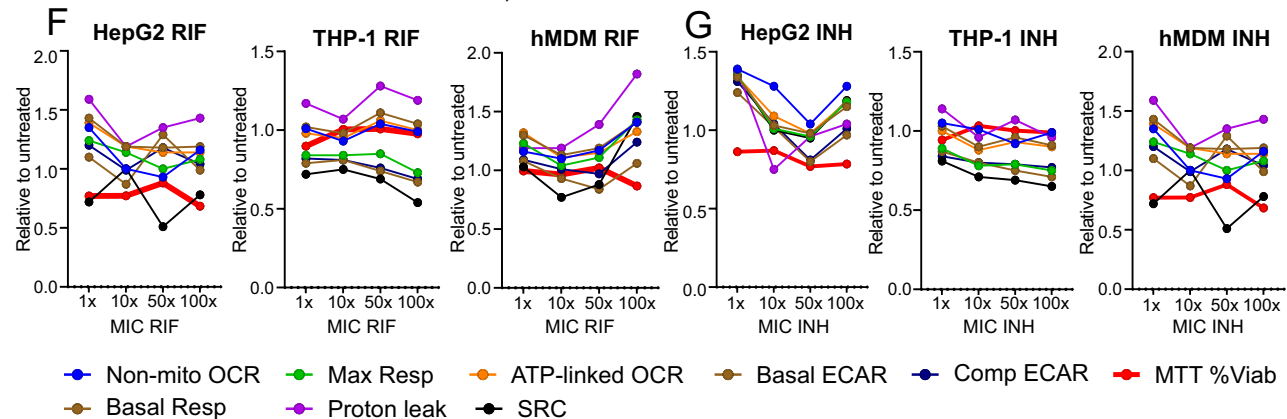

Source: http://biorxiv.org/content/10.1101/2021.05.06.443046v1.full.pdf
